# Supplementary material
Source: PubMed Central journal article supplement (PMC6985751)
Supplement: AAC.01541-19-s0001.pdf [file AAC.01541-19-s0001.pdf]

**Supplemental figure S1A: Minimal inhibitory concentration of murepavadin against *Pseudomonas aeruginosa* isolates from cystic fibrosis patients, by morphotype.**

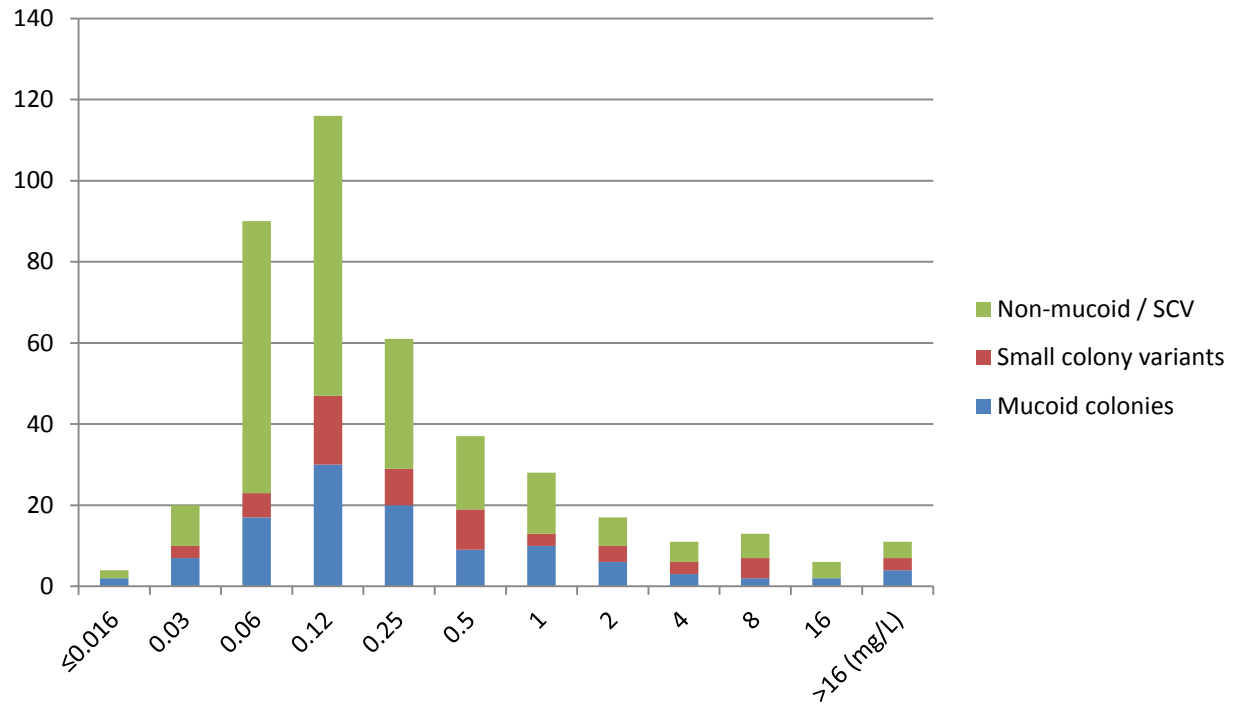

Minimal inhibitory concentration (MIC) in mg/L of 414 *Pseudomonas aeruginosa* isolates from cystic fibrosis patients, stacked by morphotype. The Y-axis depicts the number of strains.

**Supplemental figure S1B: Minimal inhibitory concentration of murepavadin against *Pseudomonas aeruginosa* isolates from cystic fibrosis patients, by age group.**

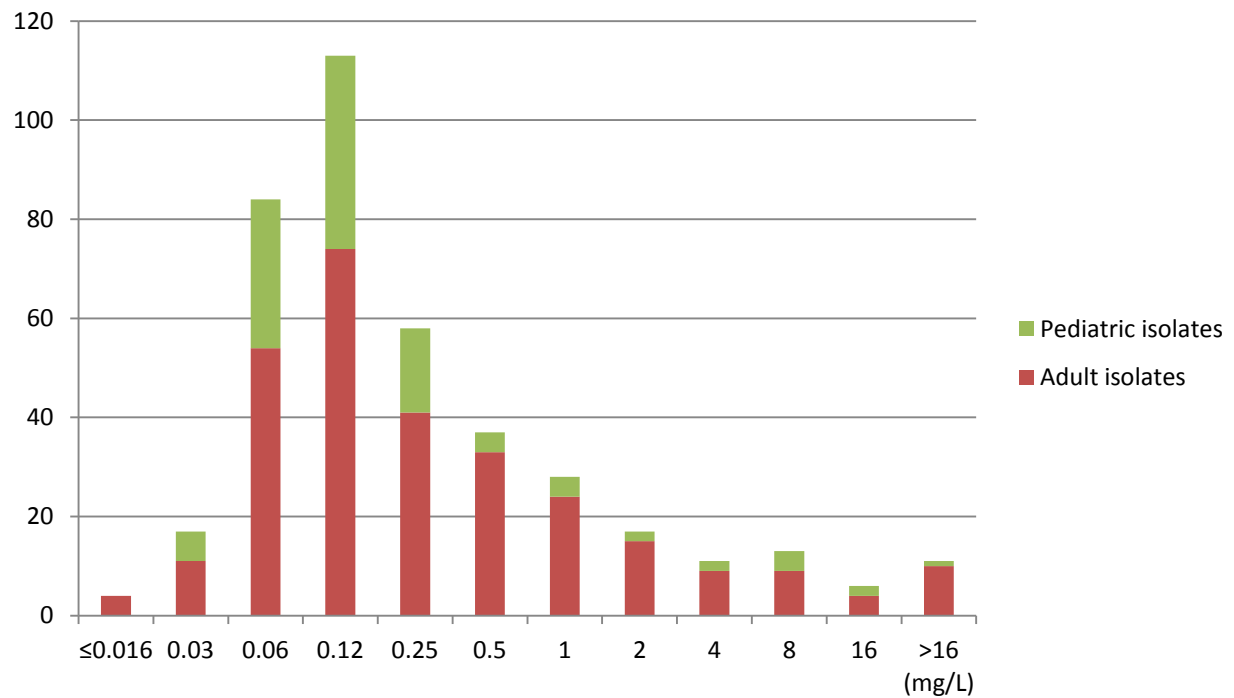

Minimal inhibitory concentration (MIC) in mg/L of 399 *Pseudomonas aeruginosa* isolates from cystic fibrosis patients for whom age group was available, stacked by age group (pediatric: younger than 18 years old; adult: over 18 years old). The Y-axis depicts the number of strains.

**Supplemental figure S2: Minimal inhibitory concentration of cephalosporins and cephalosporin / betalactamase-inhibitor combinations against *Pseudomonas aeruginosa* isolates from cystic fibrosis patients.**

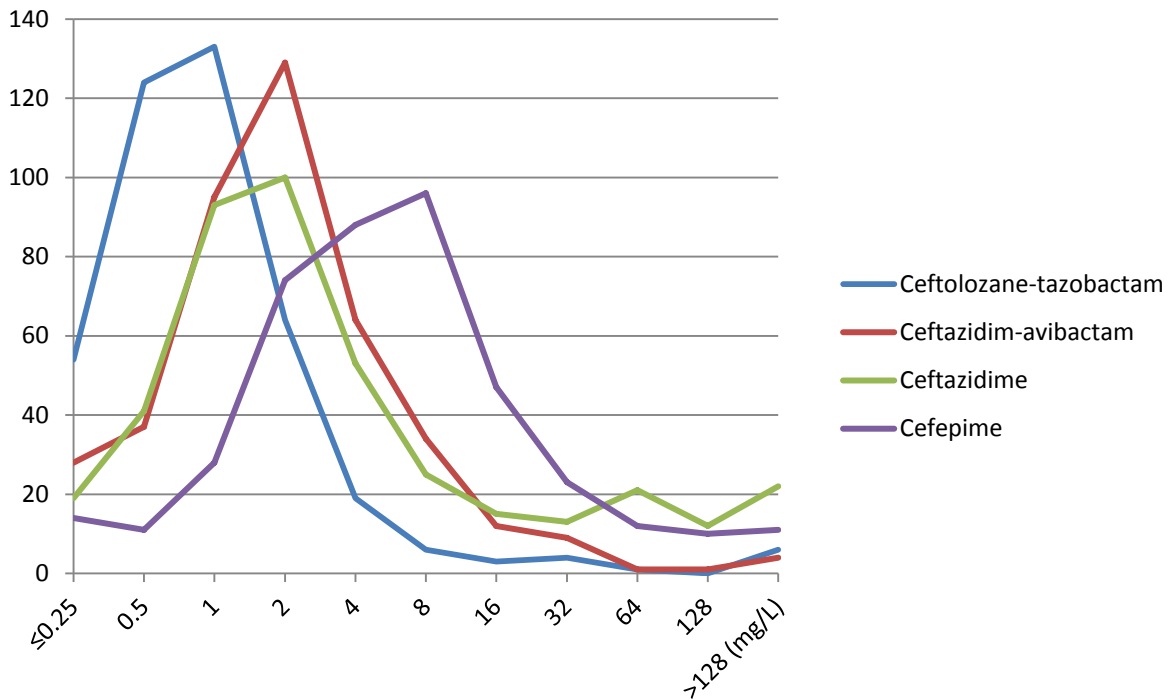

Minimal inhibitory concentration (MIC) in mg/L of 414 *Pseudomonas aeruginosa* isolates from cystic fibrosis patients, comparing the activity of different cephalosporins and cephalosporin / betalactamase-inhibitor combinations . The Y-axis depicts the number of strains.

**Supplemental figure S3: Minimal inhibitory concentration of aminoglycosides against *Pseudomonas aeruginosa* isolates from cystic fibrosis patients.**

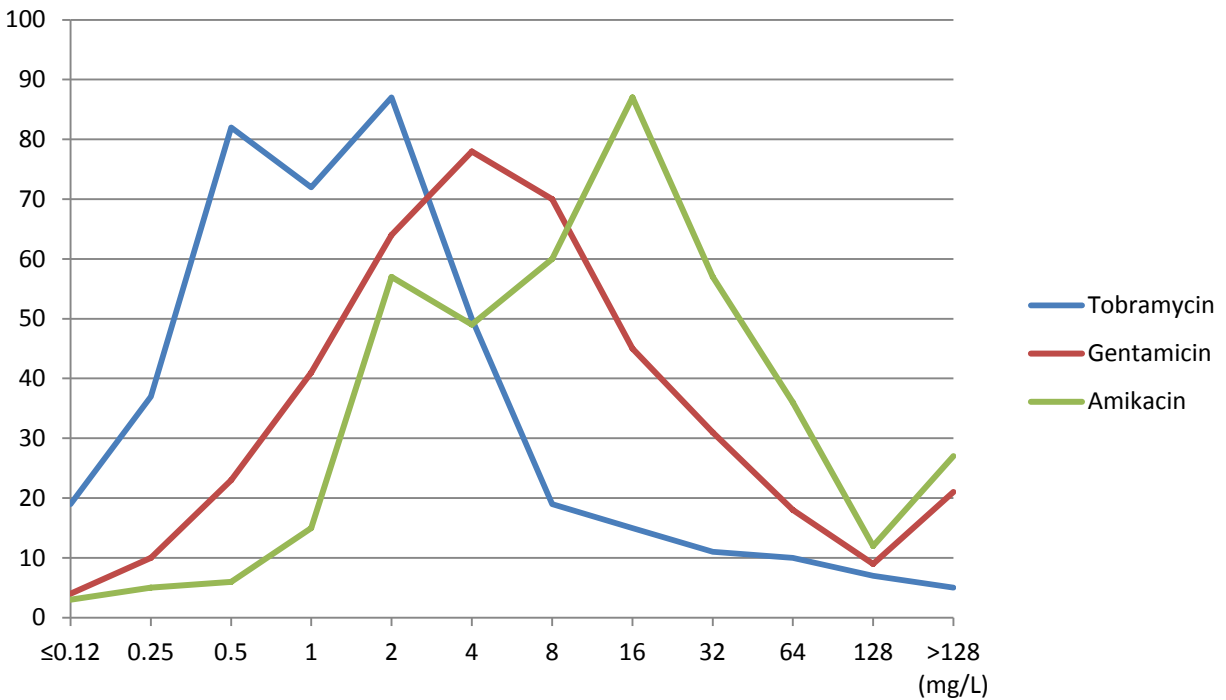

Minimal inhibitory concentration (MIC) in mg/L of 414 *Pseudomonas aeruginosa* isolates from cystic fibrosis patients, comparing the activity of different aminoglycosides. The Y-axis depicts the number of strains.

**Supplemental Figure 4 A-N: Sequence type distribution of *Pseudomonas aeruginosa* strains isolated from persons with cystic fibrosis with depiction of relative antimicrobial susceptibility.**

Legend: Minimum spanning tree of 412 *Pseudomonas aeruginosa* respiratory isolates from cystic fibrosis patients, indicating the distribution of isolates over minimal inhibitory concentrations (MICs), compared to the MIC<sub>50</sub> and MIC<sub>90</sub> of the collection, for murepavadin (A), cefepime (B), ceftazidime (C), ceftazidime-avibactam (D), ceftolozane-tazobactam (E), piperacillin-tazobactam (F), meropenem (G), imipenem (H), aztreonam (I), ciprofloxacin (J), gentamicin (K), tobramycin (L), amikacin (M) and colistin (N). Sequence types (STs) based on seven housekeeping genes as determined by whole genome sequencing. The numbers in the circles indicate the STs assigned by PubMLST ([www.pubmlst.org](http://www.pubmlst.org)). Xx and xy are isolates with partially deleted housekeeping genes which could not be assigned an ST. The circle size indicates the number of isolates with the same ST. The numbers on the lines between the circles indicate the number of allele differences between two STs.

Graphical differences between the figures in the representation of the trees are the result of the software calculating and drawing a new minimum spanning tree for each figure, after input of the susceptibility categories. This may lead to different placements on the page, rotations and inversions. Occasionally the program may choose a different connection between strains when two options are equivalent.

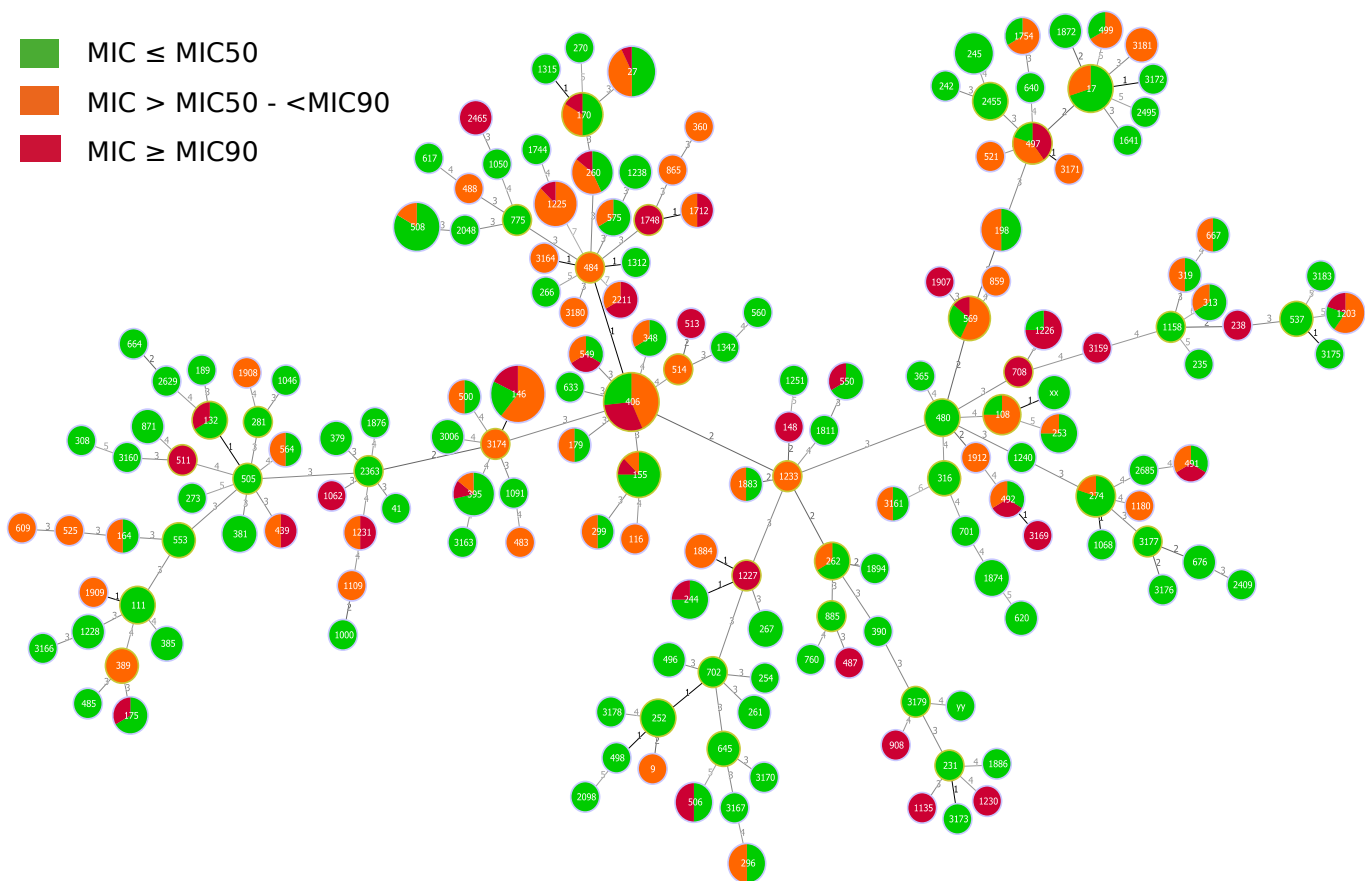

Supplemental figure 4A: MIC distribution of murepavadin

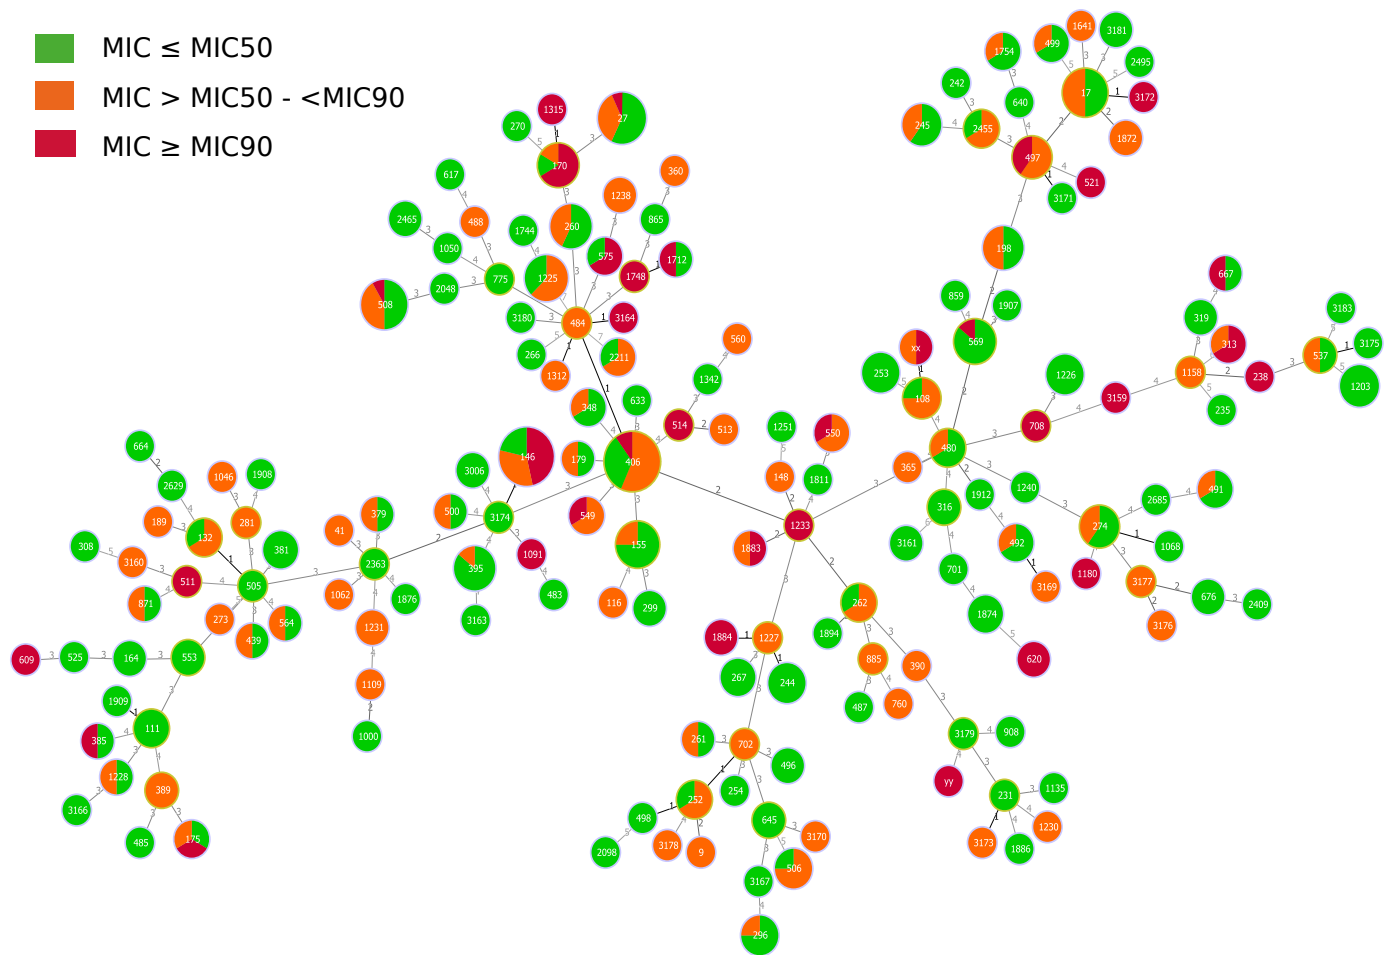

Supplemental figure 4B: MIC distribution of cefepime

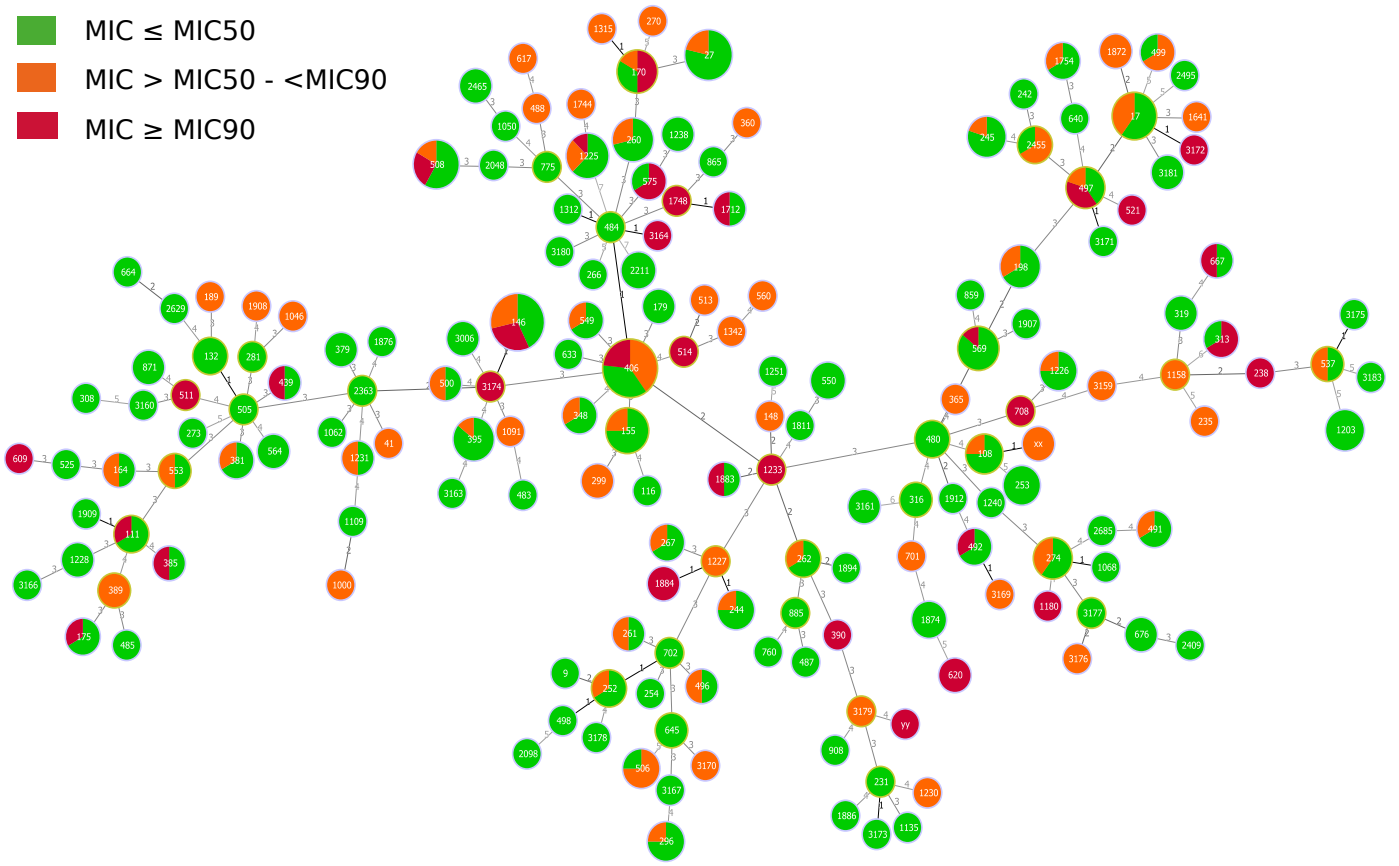

Supplemental figure 4C: MIC distribution of ceftazidime



- MIC  $\leq$  MIC50
- MIC  $>$  MIC50 -  $<$  MIC90
- MIC  $\geq$  MIC90

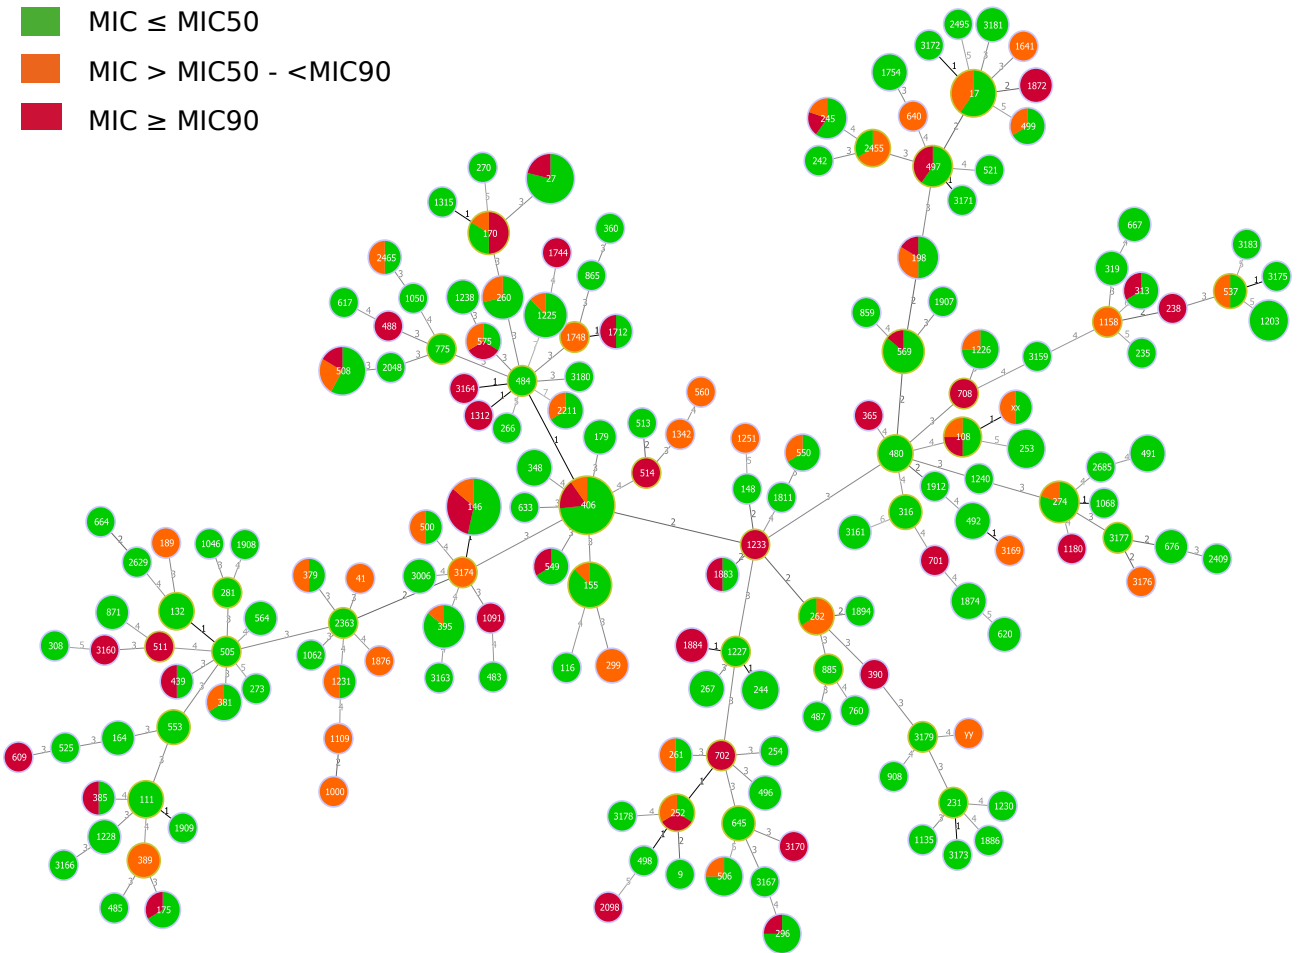

Supplemental figure 4D: MIC distribution of ceftazidime-avibactam

■ MIC ≤ MIC50  
■ MIC ≥ MIC90

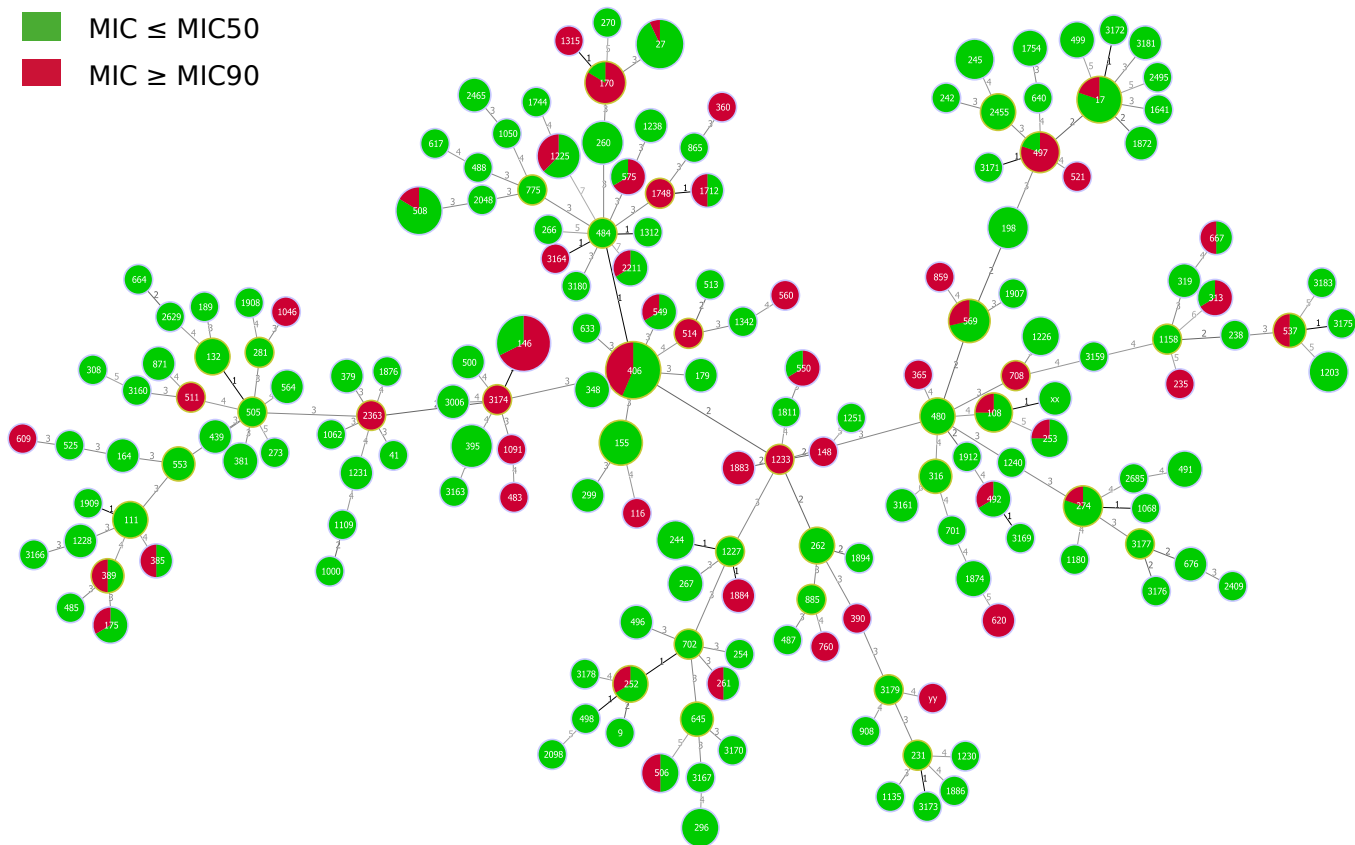

Supplemental figure 4E: MIC distribution of ceftolozane-tazobactam

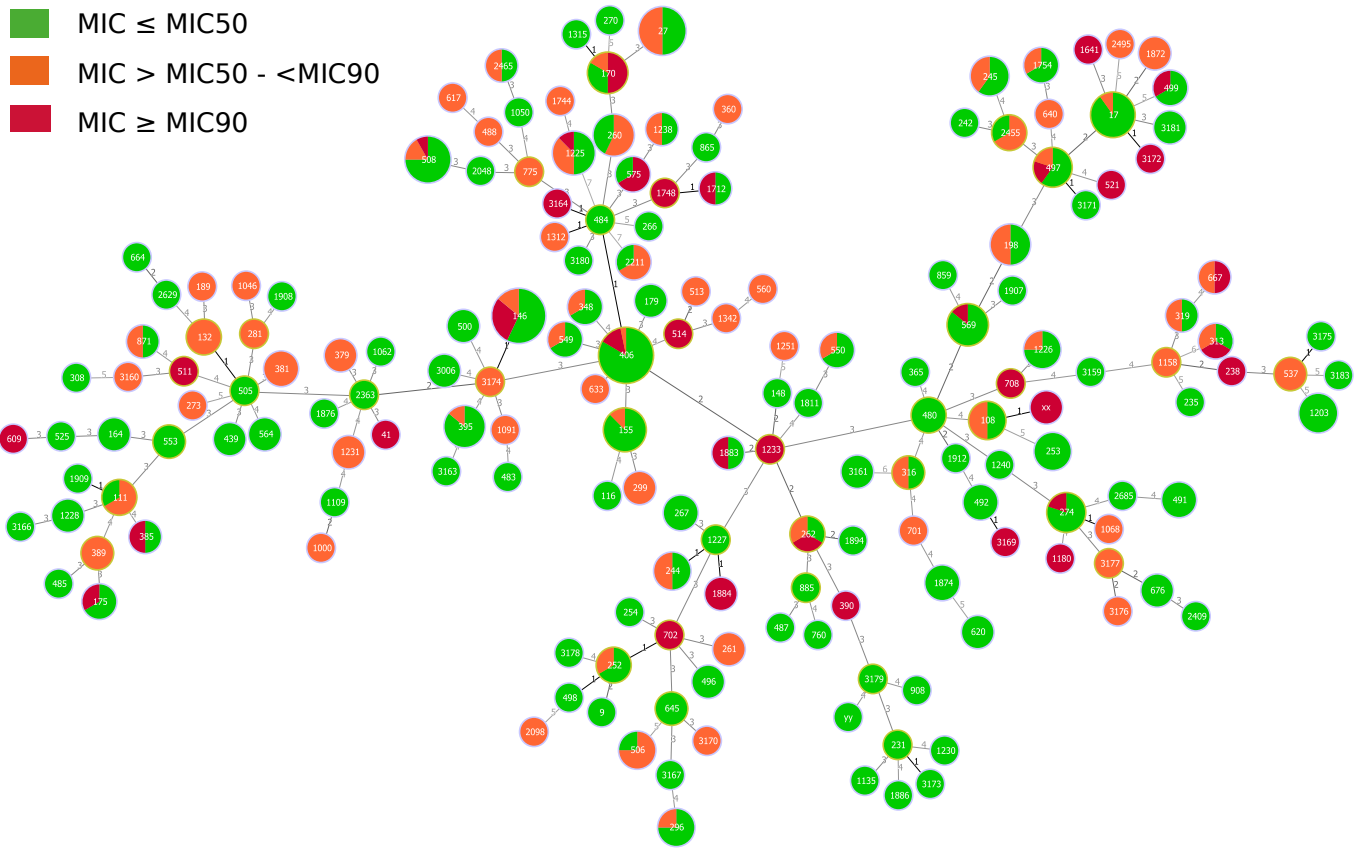

Supplemental figure 4F: MIC distribution of piperacillin-tazobactam

- MIC  $\leq$  MIC50
- MIC  $>$  MIC50 -  $<$  MIC90
- MIC  $\geq$  MIC90

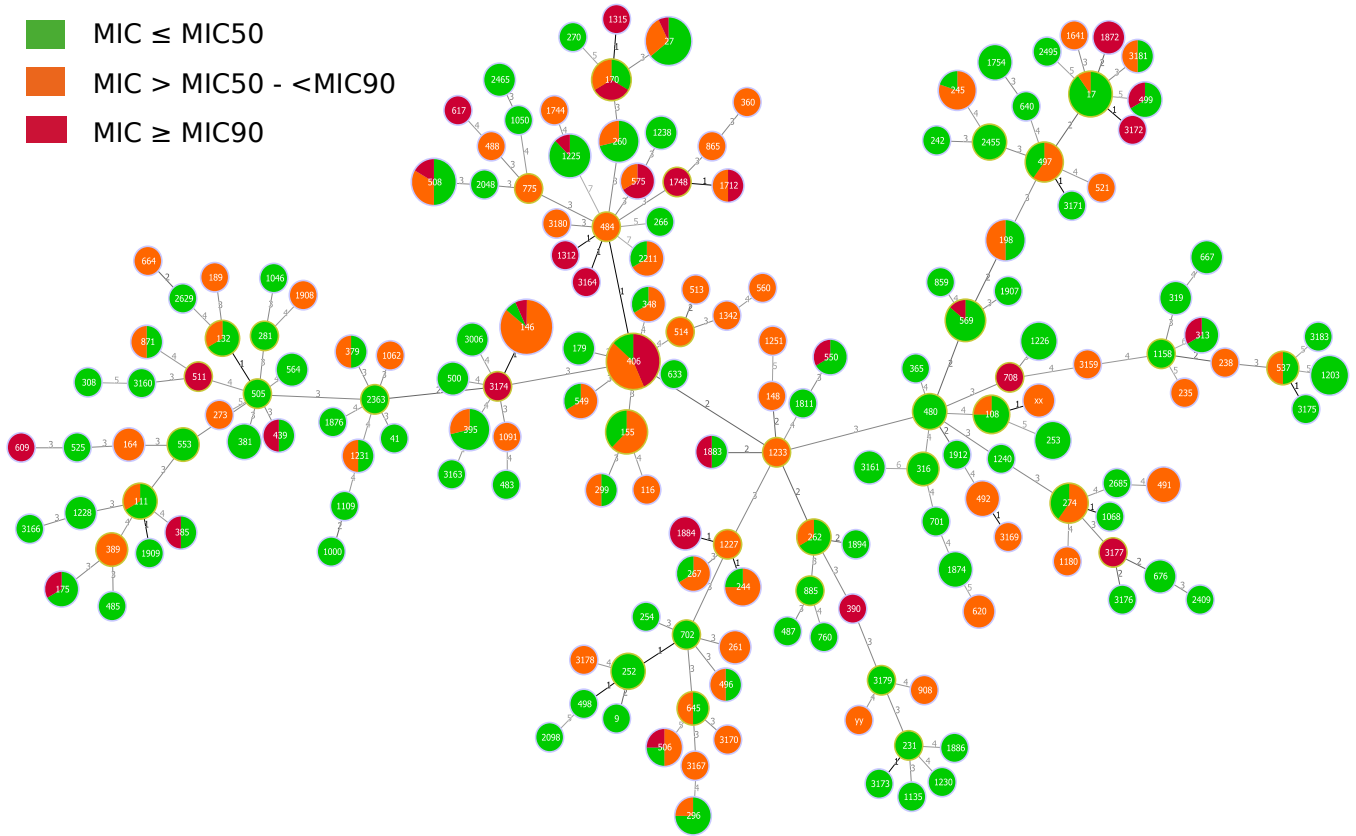

Supplemental figure 4G: MIC distribution of meropenem

- MIC  $\leq$  MIC50
- MIC  $>$  MIC50 -  $<$  MIC90
- MIC  $\geq$  MIC90

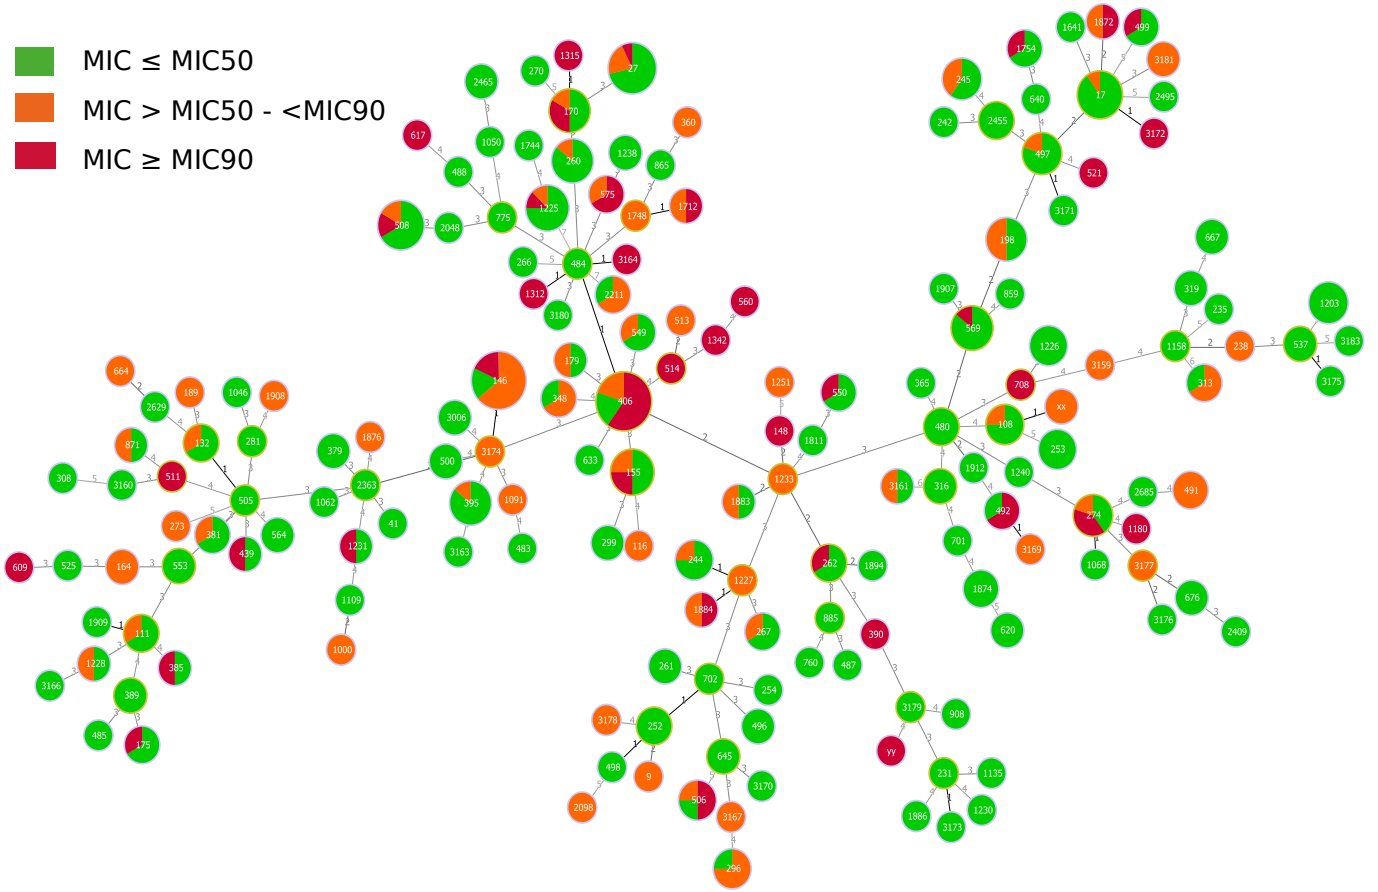

Supplemental figure 4H: MIC distribution of imipenem

- MIC  $\leq$  MIC50
- MIC  $>$  MIC50 -  $<$  MIC90
- MIC  $\geq$  MIC90

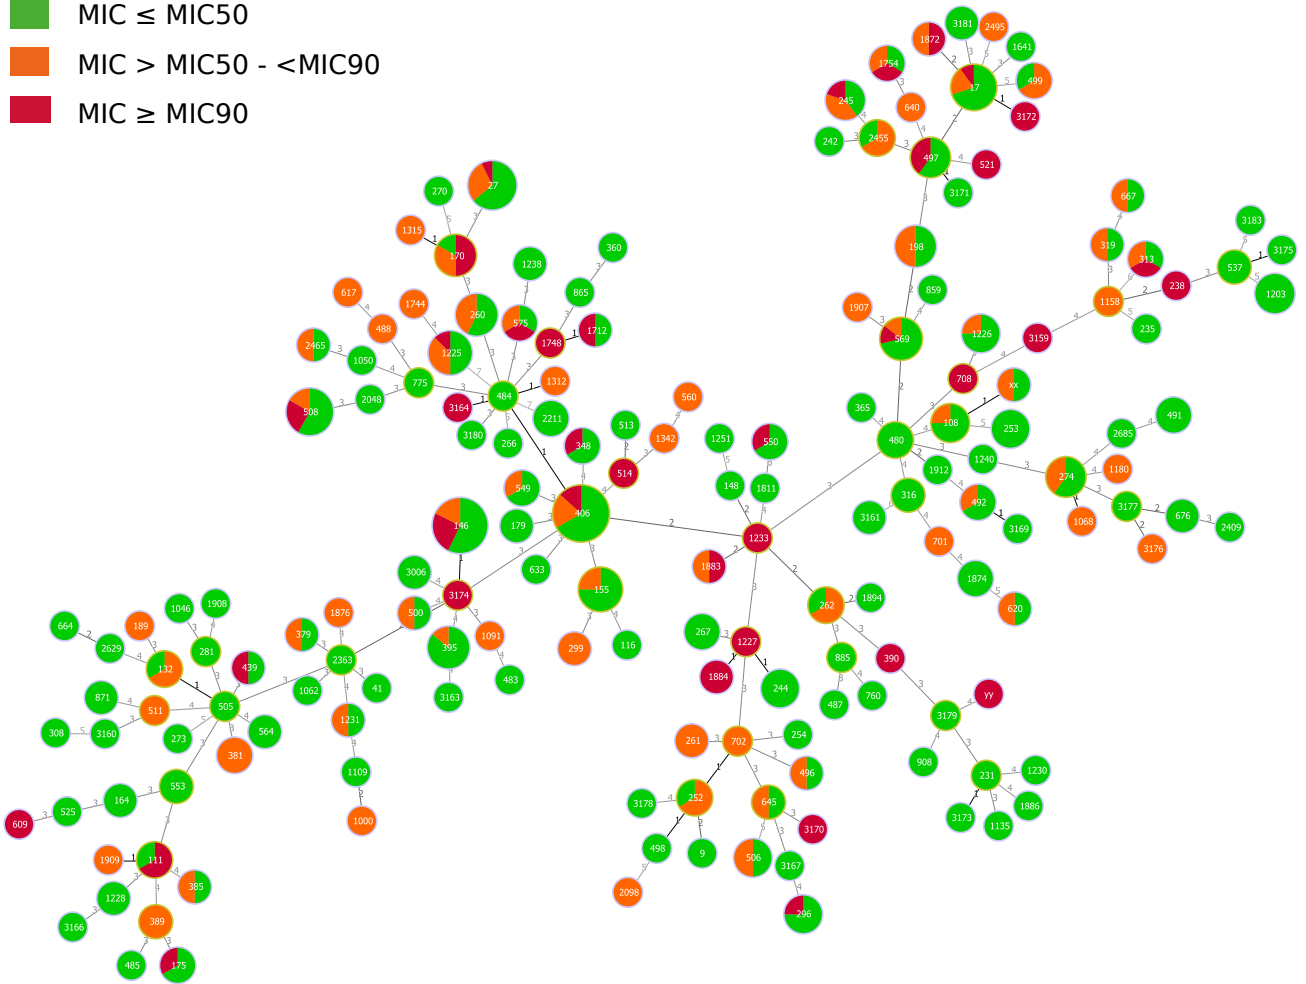

Supplemental figure 4I: MIC distribution of aztreonam

- MIC  $\leq$  MIC50
- MIC  $>$  MIC50 -  $<$  MIC90
- MIC  $\geq$  MIC90

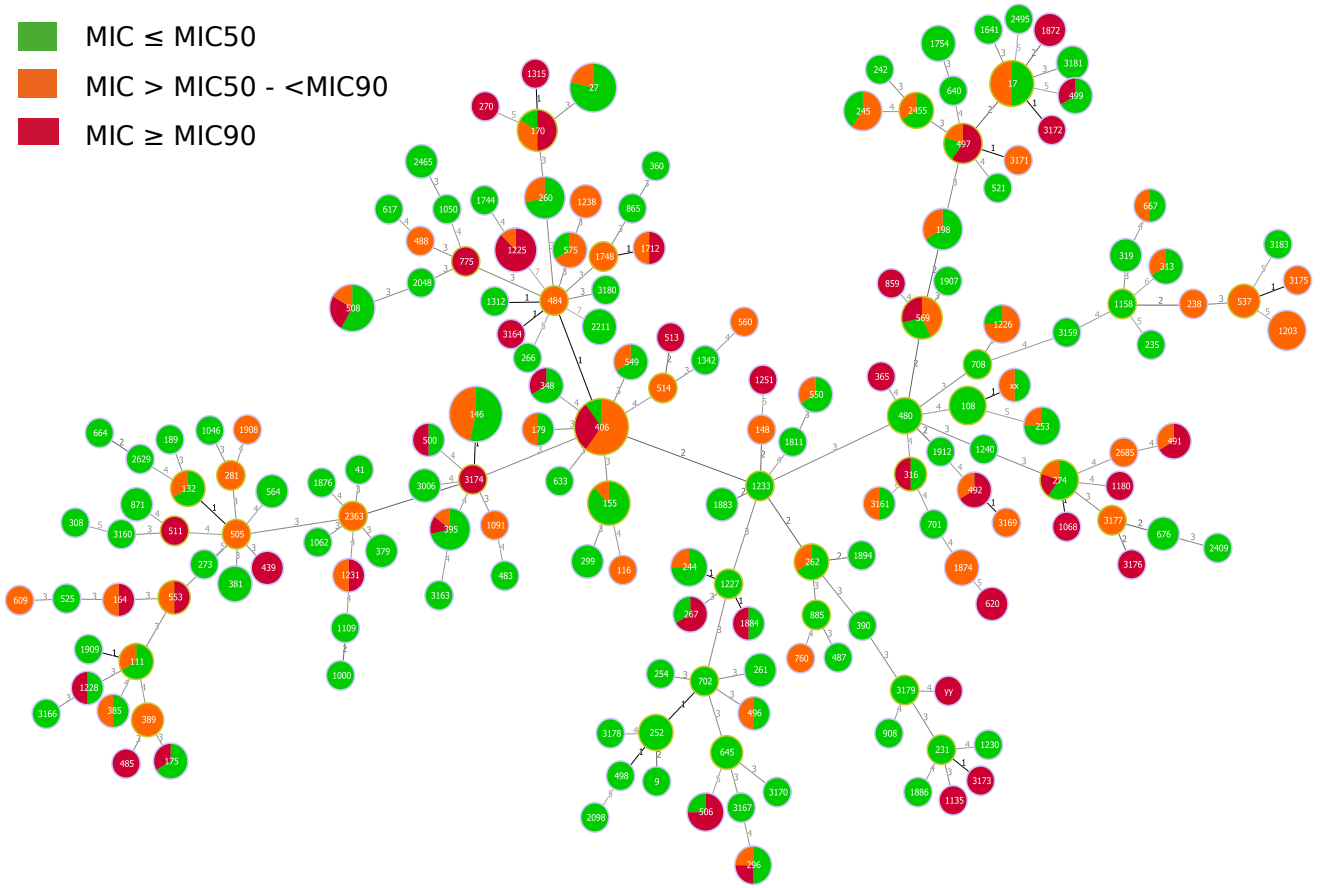

Supplemental figure 4J: MIC distribution of ciprofloxacin

- MIC  $\leq$  MIC50
- MIC  $>$  MIC50 -  $<$  MIC90
- MIC  $\geq$  MIC90

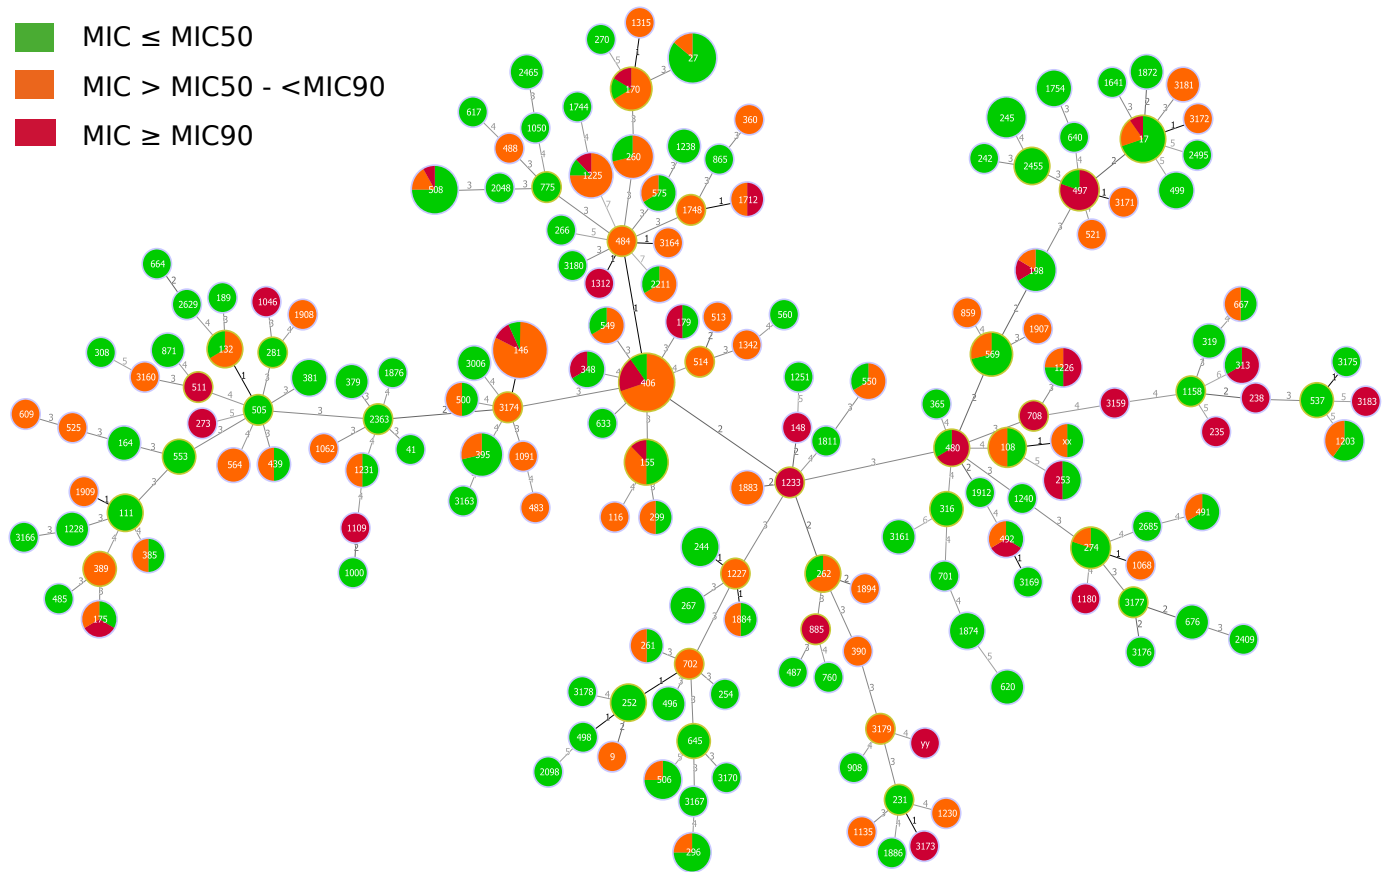

Supplemental figure 4K: MIC distribution of gentamicin



- MIC  $\leq$  MIC50
- MIC > MIC50 - < MIC90
- MIC  $\geq$  MIC90

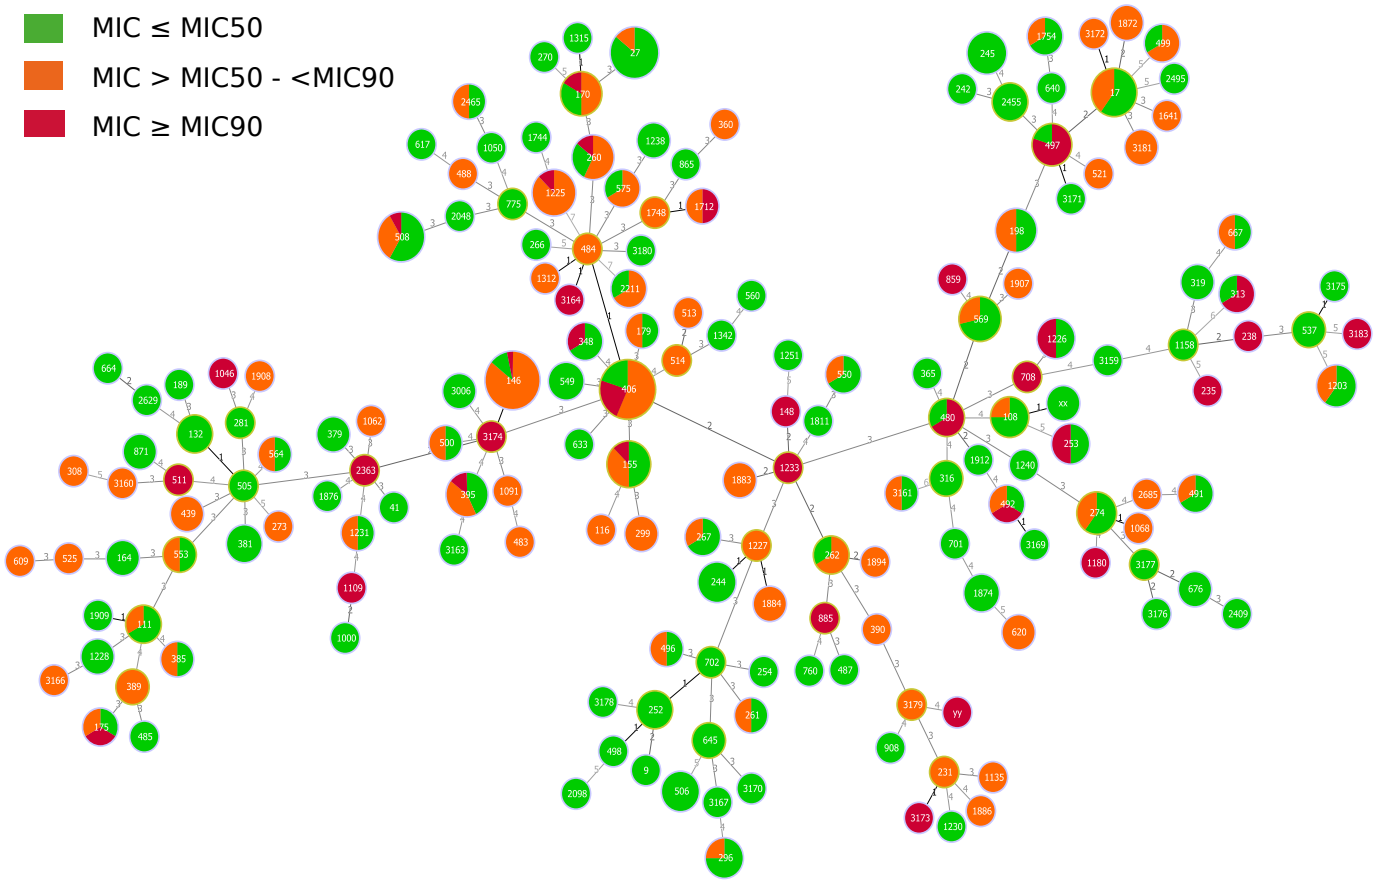

Supplemental figure 4L: MIC distribution of tobramycin

- MIC  $\leq$  MIC50
- MIC  $>$  MIC50 -  $<$  MIC90
- MIC  $\geq$  MIC90

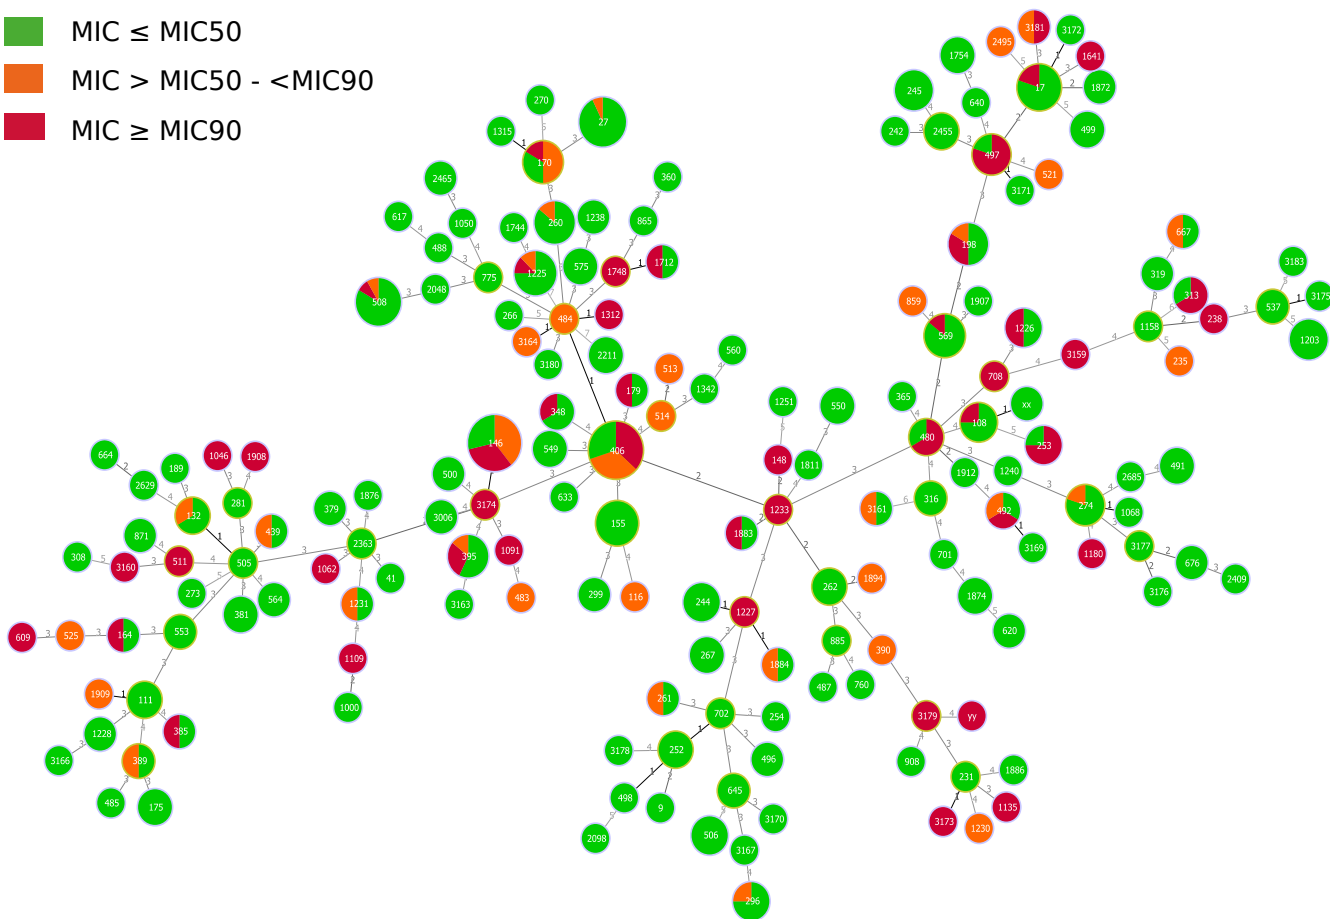

Supplemental figure 4M: MIC distribution of amikacin

■ MIC ≤ MIC50  
■ MIC ≥ MIC90

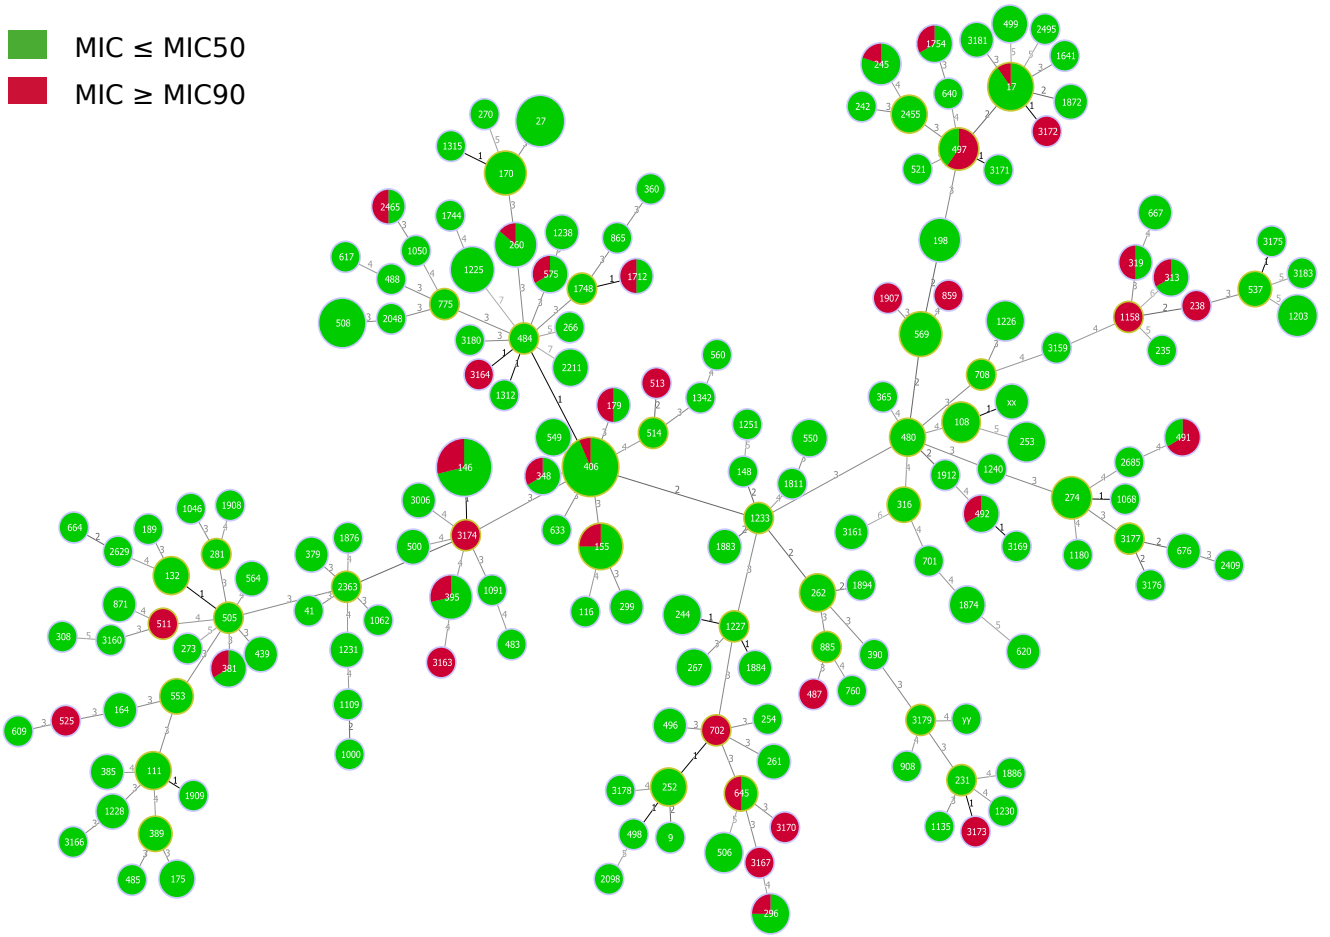

Supplemental figure 4N: MIC distribution of colistin

**Supplemental Table S1: Source data by Sequence type (ST) for antibiotic susceptibility, geographic origin and age category of 412 *Pseudomonas aeruginosa* strains from persons with cystic fibrosis.**

Values in the tables with antibiotics, indicate the minimal inhibitory concentration in mg/L. Uneven values indicate a value above the highest dilution tested. I.e.: 17: >16 mg/L; 65: >64 mg/L; 129: >128 mg/L; 257: >256 mg/L. Acs, aro, gua, mut, nuo, pps and trp are the housekeeping genes used to assign sequence types. Adult = patient age ≥ 18 years; ped = patient age < 18 years.

| ID        | ST | acs | aro | gua | mut | nuo | pps | trp | murepavadin | cefepime | ceftazidime | ceftazidime-avibactam | ceftolozane-tazobactam | piperacillin-tazobactam | meropenem | imipenem | aztreonam | ciprofloxacin | gentamicin | tobramycin | amikacin | colistin | Adult / ped | Country          |
|-----------|----|-----|-----|-----|-----|-----|-----|-----|-------------|----------|-------------|-----------------------|------------------------|-------------------------|-----------|----------|-----------|---------------|------------|------------|----------|----------|-------------|------------------|
| 16-540803 | 9  | 6   | 6   | 4   | 3   | 3   | 44  | 7   | 0.25        | 8        | 2           | 2                     | 1                      | 2                       | 0.12      | 4        | 8         | 0.25          | 8          | 1          | 16       | 1        | Ped         | the Netherlands  |
| 16-533590 | 17 | 11  | 5   | 1   | 7   | 9   | 4   | 7   | 0.06        | 4        | 2           | 4                     | 2                      | 4                       | 0.12      | 1        | 8         | 2             | 2          | 0.5        | 8        | 0.5      | Ped         | the Netherlands  |
| 16-533592 | 17 | 11  | 5   | 1   | 7   | 9   | 4   | 7   | 0.06        | 1        | 0.5         | 1                     | 0.5                    | 2                       | 2         | 8        | 2         | 2             | 2          | 1          | 8        | 1        | Ped         | the Netherlands  |
| 16-538227 | 17 | 11  | 5   | 1   | 7   | 9   | 4   | 7   | 0.06        | 2        | 16          | 4                     | 0.5                    | 4                       | 0.12      | 2        | 16        | 2             | 2          | 0.5        | 2        | 0.5      | Ped         | the Netherlands  |
| 16-540762 | 17 | 11  | 5   | 1   | 7   | 9   | 4   | 7   | 0.12        | 8        | 4           | 4                     | 1                      | 8                       | 0.25      | 1        | 32        | 1             | 2          | 0.5        | 8        | 1        | Ped         | the Netherlands  |
| 16-543337 | 17 | 11  | 5   | 1   | 7   | 9   | 4   | 7   | 0.25        | 8        | 2           | 2                     | 1                      | 2                       | 0.06      | 1        | 1         | 0.25          | 16         | 2          | 64       | 0.5      | Adult       | Northern Ireland |
| 16-543376 | 17 | 11  | 5   | 1   | 7   | 9   | 4   | 7   | 0.12        | 8        | 1           | 2                     | 1                      | 1                       | 0.06      | 0.5      | 1         | 0.5           | 4          | 0.5        | 8        | 0.5      | Adult       | Northern Ireland |
| 16-543383 | 17 | 11  | 5   | 1   | 7   | 9   | 4   | 7   | 0.5         | 8        | 4           | 4                     | 2                      | 2                       | 0.06      | 1        | 2         | 0.25          | 64         | 8          | 64       | 0.5      | Adult       | Northern Ireland |
| 16-543385 | 17 | 11  | 5   | 1   | 7   | 9   | 4   | 7   | 0.25        | 8        | 1           | 2                     | 1                      | 1                       | 0.06      | 1        | 1         | 0.5           | 8          | 2          | 16       | 1        | Adult       | Northern Ireland |
| 16-555920 | 17 | 11  | 5   | 1   | 7   | 9   | 4   | 7   | 0.12        | 4        | 4           | 1                     | 1                      | 1                       | 0.06      | 1        | 256       | 2             | 4          | 2          | 8        | 17       | Adult       | the Netherlands  |
| 16-555921 | 17 | 11  | 5   | 1   | 7   | 9   | 4   | 7   | 0.06        | 4        | 2           | 1                     | 0.5                    | 4                       | 0.25      | 1        | 4         | 4             | 2          | 0.5        | 2        | 1        | Adult       | the Netherlands  |
| 16-537458 | 27 | 6   | 5   | 6   | 7   | 4   | 6   | 7   | 0.25        | 2        | 1           | 0.5                   | 0.5                    | 0.5                     | 0.06      | 0.5      | 0.5       | 0.5           | 4          | 1          | 16       | 1        | Ped         | Spain            |
| 16-537459 | 27 | 6   | 5   | 6   | 7   | 4   | 6   | 7   | 0.5         | 1        | 0.25        | 0.5                   | 0.12                   | 1                       | 0.06      | 0.12     | 0.25      | 0.25          | 0.5        | 0.5        | 1        | 0.5      | Ped         | Spain            |
| 16-537474 | 27 | 6   | 5   | 6   | 7   | 4   | 6   | 7   | 0.03        | 8        | 8           | 8                     | 2                      | 16                      | 4         | 8        | 128       | 4             | 2          | 0.5        | 2        | 0.5      | Ped         | Spain            |
| 16-537519 | 27 | 6   | 5   | 6   | 7   | 4   | 6   | 7   | 0.03        | 4        | 1           | 1                     | 0.5                    | 0.5                     | 0.06      | 1        | 0.5       | 0.25          | 4          | 0.5        | 8        | 0.5      |             | Spain            |
| 16-537520 | 27 | 6   | 5   | 6   | 7   | 4   | 6   | 7   | 0.06        | 4        | 1           | 2                     | 0.5                    | 8                       | 0.12      | 1        | 8         | 2             | 4          | 1          | 16       | 1        |             | Spain            |
| 16-537521 | 27 | 6   | 5   | 6   | 7   | 4   | 6   | 7   | 0.12        | 2        | 0.5         | 2                     | 0.25                   | 4                       | 0.06      | 0.25     | 0.25      | 0.5           | 4          | 1          | 16       | 0.5      |             | Spain            |
| 16-537522 | 27 | 6   | 5   | 6   | 7   | 4   | 6   | 7   | 0.25        | 8        | 1           | 2                     | 1                      | 8                       | 0.12      | 0.5      | 8         | 0.25          | 16         | 2          | 32       | 0.5      |             | Spain            |
| 16-537523 | 27 | 6   | 5   | 6   | 7   | 4   | 6   | 7   | 0.03        | 8        | 2           | 2                     | 1                      | 8                       | 1         | 16       | 16        | 1             | 4          | 1          | 16       | 0.5      |             | Spain            |

|           |     |    |    |    |    |   |    |    |      |     |      |     |      |      |      |      |      |      |    |      |     |     |       |                  |
|-----------|-----|----|----|----|----|---|----|----|------|-----|------|-----|------|------|------|------|------|------|----|------|-----|-----|-------|------------------|
| 16-537525 | 27  | 6  | 5  | 6  | 7  | 4 | 6  | 7  | 0.25 | 32  | 4    | 32  | 0.5  | 32   | 2    | 16   | 16   | 1    | 4  | 0.5  | 4   | 0.5 |       | Spain            |
| 16-538276 | 27  | 6  | 5  | 6  | 7  | 4 | 6  | 7  | 17   | 0.5 | 0.25 | 8   | 0.5  | 0.25 | 0.06 | 0.25 | 0.25 | 0.5  | 4  | 1    | 16  | 1   | Adult | the Netherlands  |
| 16-540764 | 27  | 6  | 5  | 6  | 7  | 4 | 6  | 7  | 0.25 | 8   | 2    | 2   | 1    | 1    | 0.5  | 2    | 8    | 4    | 8  | 1    | 16  | 1   | Ped   | the Netherlands  |
| 16-547161 | 27  | 6  | 5  | 6  | 7  | 4 | 6  | 7  | 0.12 | 0.5 | 0.5  | 0.5 | 0.25 | 0.25 | 0.06 | 0.12 | 0.5  | 0.12 | 1  | 0.25 | 4   | 0.5 | Adult | the Netherlands  |
| 16-547162 | 27  | 6  | 5  | 6  | 7  | 4 | 6  | 7  | 0.03 | 1   | 1    | 1   | 0.25 | 16   | 0.06 | 0.5  | 16   | 0.12 | 1  | 0.25 | 4   | 1   | Adult | the Netherlands  |
| 16-548981 | 27  | 6  | 5  | 6  | 7  | 4 | 6  | 7  | 0.25 | 16  | 4    | 1   | 0.5  | 64   | 16   | 32   | 16   | 0.25 | 4  | 2    | 16  | 0.5 | Adult | the Netherlands  |
| 16-538333 | 41  | 28 | 5  | 6  | 11 | 4 | 4  | 14 | 0.06 | 16  | 8    | 4   | 1    | 128  | 0.12 | 0.5  | 8    | 0.5  | 2  | 0.25 | 2   | 1   | Adult | the Netherlands  |
| 16-538190 | 108 | 39 | 5  | 20 | 5  | 1 | 6  | 31 | 0.25 | 8   | 2    | 4   | 1    | 2    | 0.06 | 1    | 1    | 0.25 | 8  | 1    | 16  | 1   | Ped   | the Netherlands  |
| 16-538235 | 108 | 39 | 5  | 20 | 5  | 1 | 6  | 31 | 0.25 | 8   | 4    | 2   | 2    | 8    | 1    | 8    | 8    | 1    | 16 | 8    | 64  | 1   | Ped   | the Netherlands  |
| 16-538244 | 108 | 39 | 5  | 20 | 5  | 1 | 6  | 31 | 1    | 8   | 0.5  | 1   | 1    | 2    | 0.06 | 0.25 | 0.5  | 0.5  | 2  | 0.5  | 4   | 1   | Ped   | the Netherlands  |
| 16-540766 | 108 | 39 | 5  | 20 | 5  | 1 | 6  | 31 | 0.06 | 4   | 2    | 8   | 1    | 16   | 0.25 | 1    | 16   | 0.06 | 4  | 1    | 8   | 0.5 | Ped   | the Netherlands  |
| 16-538239 | 111 | 17 | 5  | 5  | 4  | 4 | 4  | 3  | 0.12 | 1   | 1    | 2   | 1    | 8    | 0.12 | 2    | 4    | 0.5  | 2  | 0.5  | 2   | 1   | Ped   | the Netherlands  |
| 16-543355 | 111 | 17 | 5  | 5  | 4  | 4 | 4  | 3  | 0.06 | 1   | 256  | 2   | 0.5  | 8    | 4    | 16   | 257  | 4    | 2  | 2    | 4   | 0.5 | Adult | Northern Ireland |
| 16-543357 | 111 | 17 | 5  | 5  | 4  | 4 | 4  | 3  | 0.06 | 4   | 1    | 2   | 1    | 4    | 0.06 | 2    | 257  | 0.12 | 2  | 0.5  | 8   | 1   | Adult | Northern Ireland |
| 16-537349 | 116 | 28 | 24 | 22 | 18 | 3 | 15 | 7  | 0.25 | 16  | 2    | 2   | 2    | 1    | 1    | 16   | 1    | 2    | 16 | 2    | 32  | 1   | Adult | Spain            |
| 16-537393 | 132 | 6  | 20 | 1  | 3  | 4 | 4  | 2  | 0.12 | 8   | 2    | 2   | 0.5  | 64   | 0.12 | 1    | 4    | 0.5  | 8  | 0.25 | 8   | 1   | Adult | Spain            |
| 16-538280 | 132 | 6  | 20 | 1  | 3  | 4 | 4  | 2  | 2    | 8   | 2    | 1   | 0.5  | 32   | 1    | 4    | 16   | 4    | 8  | 0.5  | 32  | 0.5 | Adult | the Netherlands  |
| 16-540768 | 132 | 6  | 20 | 1  | 3  | 4 | 4  | 2  | 0.06 | 2   | 2    | 2   | 0.5  | 8    | 0.25 | 2    | 16   | 0.25 | 4  | 0.5  | 2   | 1   | Adult | the Netherlands  |
| 16-543338 | 146 | 6  | 5  | 11 | 3  | 4 | 23 | 1  | 0.25 | 129 | 128  | 32  | 16   | 256  | 8    | 16   | 1    | 4    | 16 | 2    | 32  | 0.5 | Adult | United Kingdom   |
| 16-543341 | 146 | 6  | 5  | 11 | 3  | 4 | 23 | 1  | 8    | 4   | 1    | 1   | 2    | 0.25 | 1    | 32   | 0.5  | 1    | 64 | 8    | 128 | 8   | Adult | United Kingdom   |
| 16-543358 | 146 | 6  | 5  | 11 | 3  | 4 | 23 | 1  | 1    | 4   | 2    | 2   | 2    | 0.5  | 2    | 16   | 0.5  | 2    | 64 | 8    | 64  | 2   | Adult | United Kingdom   |
| 16-543363 | 146 | 6  | 5  | 11 | 3  | 4 | 23 | 1  | 0.25 | 8   | 2    | 8   | 2    | 64   | 4    | 16   | 1    | 2    | 32 | 4    | 64  | 0.5 | Adult | United Kingdom   |

|           |     |   |   |    |   |   |    |   |      |      |     |      |      |      |      |      |      |     |    |      |    |     |       |                |
|-----------|-----|---|---|----|---|---|----|---|------|------|-----|------|------|------|------|------|------|-----|----|------|----|-----|-------|----------------|
| 16-543365 | 146 | 6 | 5 | 11 | 3 | 4 | 23 | 1 | 0.25 | 8    | 16  | 2    | 1    | 2    | 4    | 8    | 16   | 2   | 4  | 0.5  | 8  | 0.5 | Adult | United Kingdom |
| 16-543371 | 146 | 6 | 5 | 11 | 3 | 4 | 23 | 1 | 0.25 | 8    | 1   | 1    | 1    | 1    | 0.5  | 4    | 1    | 0.5 | 8  | 2    | 32 | 1   | Adult | United Kingdom |
| 16-543372 | 146 | 6 | 5 | 11 | 3 | 4 | 23 | 1 | 1    | 8    | 1   | 1    | 0.5  | 0.5  | 2    | 16   | 1    | 0.5 | 8  | 2    | 32 | 4   | Adult | United Kingdom |
| 16-543373 | 146 | 6 | 5 | 11 | 3 | 4 | 23 | 1 | 0.25 | 8    | 1   | 1    | 0.5  | 1    | 0.5  | 4    | 0.5  | 1   | 16 | 2    | 32 | 0.5 | Adult | United Kingdom |
| 16-543374 | 146 | 6 | 5 | 11 | 3 | 4 | 23 | 1 | 0.12 | 2    | 32  | 0.25 | 1    | 0.5  | 8    | 16   | 32   | 0.5 | 16 | 4    | 32 | 1   | Adult | United Kingdom |
| 16-543375 | 146 | 6 | 5 | 11 | 3 | 4 | 23 | 1 | 0.5  | 8    | 0.5 | 0.25 | 2    | 0.5  | 0.5  | 4    | 0.5  | 1   | 16 | 4    | 32 | 0.5 | Adult | United Kingdom |
| 16-543377 | 146 | 6 | 5 | 11 | 3 | 4 | 23 | 1 | 1    | 2    | 0.5 | 1    | 0.25 | 1    | 0.12 | 0.25 | 0.25 | 1   | 2  | 0.25 | 4  | 0.5 | Adult | United Kingdom |
| 16-543378 | 146 | 6 | 5 | 11 | 3 | 4 | 23 | 1 | 0.12 | 32   | 16  | 2    | 0.5  | 32   | 0.5  | 2    | 8    | 0.5 | 8  | 2    | 16 | 1   | Adult | United Kingdom |
| 16-543381 | 146 | 6 | 5 | 11 | 3 | 4 | 23 | 1 | 4    | 4    | 1   | 0.25 | 1    | 0.25 | 0.12 | 0.5  | 0.25 | 1   | 32 | 4    | 64 | 4   | Adult | United Kingdom |
| 16-543386 | 146 | 6 | 5 | 11 | 3 | 4 | 23 | 1 | 17   | 0.25 | 2   | 0.5  | 2    | 2    | 0.5  | 4    | 256  | 2   | 8  | 1    | 16 | 2   | Adult | United Kingdom |
| 16-543389 | 146 | 6 | 5 | 11 | 3 | 4 | 23 | 1 | 0.5  | 129  | 256 | 16   | 2    | 257  | 16   | 32   | 256  | 2   | 32 | 2    | 64 | 0.5 | Adult | United Kingdom |
| 16-543390 | 146 | 6 | 5 | 11 | 3 | 4 | 23 | 1 | 0.12 | 129  | 256 | 4    | 4    | 257  | 0.5  | 1    | 8    | 2   | 16 | 2    | 64 | 0.5 | Adult | United Kingdom |
| 16-543392 | 146 | 6 | 5 | 11 | 3 | 4 | 23 | 1 | 0.25 | 128  | 128 | 8    | 16   | 257  | 16   | 32   | 256  | 4   | 16 | 4    | 32 | 0.5 | Adult | United Kingdom |
| 16-543395 | 146 | 6 | 5 | 11 | 3 | 4 | 23 | 1 | 1    | 32   | 16  | 2    | 2    | 2    | 4    | 8    | 1    | 1   | 32 | 8    | 32 | 1   | Adult | United Kingdom |
| 16-543396 | 146 | 6 | 5 | 11 | 3 | 4 | 23 | 1 | 2    | 128  | 256 | 16   | 8    | 257  | 8    | 16   | 257  | 2   | 64 | 16   | 64 | 1   | Adult | United Kingdom |
| 16-543398 | 146 | 6 | 5 | 11 | 3 | 4 | 23 | 1 | 0.25 | 64   | 32  | 8    | 2    | 16   | 8    | 32   | 32   | 2   | 32 | 2    | 32 | 0.5 | Adult | United Kingdom |
| 16-543399 | 146 | 6 | 5 | 11 | 3 | 4 | 23 | 1 | 0.12 | 32   | 64  | 8    | 2    | 128  | 2    | 16   | 128  | 1   | 16 | 4    | 16 | 17  | Adult | United Kingdom |
| 16-543402 | 146 | 6 | 5 | 11 | 3 | 4 | 23 | 1 | 0.12 | 32   | 64  | 4    | 2    | 128  | 4    | 32   | 128  | 1   | 16 | 4    | 16 | 17  | Adult | United Kingdom |
| 16-543403 | 146 | 6 | 5 | 11 | 3 | 4 | 23 | 1 | 0.25 | 64   | 16  | 16   | 4    | 2    | 2    | 8    | 2    | 4   | 8  | 2    | 16 | 0.5 | Adult | United Kingdom |
| 16-543406 | 146 | 6 | 5 | 11 | 3 | 4 | 23 | 1 | 0.12 | 128  | 256 | 8    | 1    | 257  | 0.5  | 2    | 128  | 1   | 16 | 4    | 64 | 1   | Adult | United Kingdom |
| 16-543407 | 146 | 6 | 5 | 11 | 3 | 4 | 23 | 1 | 0.25 | 8    | 8   | 4    | 2    | 2    | 4    | 16   | 16   | 0.5 | 16 | 4    | 32 | 1   | Adult | United Kingdom |
| 16-543409 | 146 | 6 | 5 | 11 | 3 | 4 | 23 | 1 | 1    | 16   | 1   | 2    | 4    | 2    | 4    | 8    | 32   | 2   | 32 | 4    | 64 | 16  | Adult | United Kingdom |

|           |     |    |    |    |    |    |    |    |      |  |      |      |      |     |      |      |      |      |      |     |      |     |     |       |                 |
|-----------|-----|----|----|----|----|----|----|----|------|--|------|------|------|-----|------|------|------|------|------|-----|------|-----|-----|-------|-----------------|
| 16-543410 | 146 | 6  | 5  | 11 | 3  | 4  | 23 | 1  | 2    |  | 16   | 8    | 4    | 2   | 8    | 8    | 16   | 4    | 2    | 16  | 2    | 16  | 0.5 | Adult | United Kingdom  |
| 16-543412 | 146 | 6  | 5  | 11 | 3  | 4  | 23 | 1  | 1    |  | 32   | 2    | 2    | 2   | 2    | 2    | 8    | 1    | 1    | 16  | 2    | 32  | 0.5 | Adult | United Kingdom  |
| 16-543366 | 148 | 17 | 5  | 1  | 3  | 13 | 6  | 7  | 2    |  | 8    | 32   | 1    | 2   | 2    | 4    | 32   | 8    | 2    | 128 | 64   | 129 | 1   | Adult | United Kingdom  |
| 16-537332 | 155 | 28 | 5  | 36 | 3  | 3  | 13 | 7  | 17   |  | 0.12 | 0.5  | 0.5  | 0.5 | 0.5  | 0.06 | 0.25 | 0.5  | 1    | 64  | 64   | 16  | 1   | Adult | Spain           |
| 16-537443 | 155 | 28 | 5  | 36 | 3  | 3  | 13 | 7  | 0.06 |  | 1    | 0.25 | 2    | 0.5 | 2    | 1    | 0.25 | 0.25 | 0.25 | 0.5 | 0.5  | 1   | 1   | Adult | Spain           |
| 16-538282 | 155 | 28 | 5  | 36 | 3  | 3  | 13 | 7  | 0.03 |  | 1    | 2    | 2    | 0.5 | 4    | 4    | 32   | 8    | 0.12 | 0.5 | 0.5  | 2   | 1   | Adult | the Netherlands |
| 16-540769 | 155 | 28 | 5  | 36 | 3  | 3  | 13 | 7  | 0.12 |  | 8    | 1    | 1    | 1   | 0.5  | 0.12 | 4    | 0.5  | 0.25 | 2   | 0.5  | 4   | 0.5 | Ped   | the Netherlands |
| 16-542604 | 155 | 28 | 5  | 36 | 3  | 3  | 13 | 7  | 0.25 |  | 4    | 8    | 1    | 1   | 16   | 1    | 2    | 8    | 1    | 8   | 2    | 16  | 2   | Adult | Australia       |
| 16-542605 | 155 | 28 | 5  | 36 | 3  | 3  | 13 | 7  | 0.12 |  | 2    | 0.5  | 0.5  | 0.5 | 0.5  | 0.06 | 0.25 | 0.5  | 0.25 | 8   | 2    | 16  | 2   | Adult | Australia       |
| 16-542606 | 155 | 28 | 5  | 36 | 3  | 3  | 13 | 7  | 0.12 |  | 8    | 8    | 4    | 1   | 4    | 1    | 4    | 32   | 2    | 16  | 4    | 16  | 1   | Adult | Australia       |
| 16-547156 | 155 | 28 | 5  | 36 | 3  | 3  | 13 | 7  | 0.06 |  | 2    | 2    | 1    | 0.5 | 4    | 4    | 32   | 16   | 0.12 | 0.5 | 0.12 | 2   | 1   | Adult | the Netherlands |
| 16-537337 | 164 | 1  | 5  | 1  | 11 | 4  | 10 | 10 | 0.12 |  | 4    | 2    | 2    | 1   | 4    | 1    | 16   | 8    | 4    | 4   | 0.5  | 129 | 0.5 | Ped   | Spain           |
| 16-540813 | 164 | 1  | 5  | 1  | 11 | 4  | 10 | 10 | 0.25 |  | 4    | 8    | 1    | 0.5 | 1    | 2    | 16   | 8    | 8    | 4   | 1    | 8   | 1   | Adult | the Netherlands |
| 16-538285 | 170 | 36 | 5  | 29 | 7  | 4  | 10 | 7  | 0.12 |  | 32   | 2    | 4    | 2   | 256  | 0.25 | 2    | 32   | 4    | 32  | 0.5  | 32  | 0.5 | Adult | the Netherlands |
| 16-538305 | 170 | 36 | 5  | 29 | 7  | 4  | 10 | 7  | 2    |  | 1    | 2    | 0.25 | 2   | 0.25 | 0.06 | 1    | 0.5  | 4    | 64  | 16   | 128 | 1   | Adult | the Netherlands |
| 16-538307 | 170 | 36 | 5  | 29 | 7  | 4  | 10 | 7  | 0.06 |  | 8    | 32   | 0.5  | 1   | 0.5  | 16   | 32   | 64   | 1    | 2   | 0.5  | 4   | 0.5 | Adult | the Netherlands |
| 16-540771 | 170 | 36 | 5  | 29 | 7  | 4  | 10 | 7  | 0.5  |  | 32   | 128  | 16   | 2   | 257  | 0.5  | 4    | 256  | 8    | 8   | 2    | 32  | 0.5 | Adult | the Netherlands |
| 16-547184 | 170 | 36 | 5  | 29 | 7  | 4  | 10 | 7  | 0.25 |  | 32   | 64   | 64   | 4   | 16   | 64   | 2    | 256  | 8    | 16  | 4    | 32  | 0.5 | Adult | the Netherlands |
| 16-555913 | 170 | 36 | 5  | 29 | 7  | 4  | 10 | 7  | 0.12 |  | 64   | 128  | 8    | 8   | 257  | 8    | 32   | 256  | 8    | 8   | 2    | 16  | 0.5 | Adult | the Netherlands |
| 16-537368 | 175 | 28 | 22 | 5  | 3  | 3  | 14 | 19 | 0.06 |  | 32   | 257  | 16   | 257 | 257  | 65   | 129  | 257  | 16   | 128 | 128  | 16  | 0.5 | Adult | Spain           |
| 16-538284 | 175 | 28 | 22 | 5  | 3  | 3  | 14 | 19 | 2    |  | 8    | 1    | 2    | 1   | 1    | 0.06 | 0.5  | 1    | 0.25 | 8   | 2    | 16  | 0.5 | Adult | the Netherlands |
| 16-540772 | 175 | 28 | 22 | 5  | 3  | 3  | 14 | 19 | 0.12 |  | 0.5  | 2    | 2    | 1   | 2    | 0.12 | 2    | 2    | 0.03 | 0.5 | 0.25 | 1   | 1   | Adult | the Netherlands |

|           |     |    |     |    |    |    |    |    |       |      |      |      |       |      |      |      |      |      |      |      |      |     |       |                 |
|-----------|-----|----|-----|----|----|----|----|----|-------|------|------|------|-------|------|------|------|------|------|------|------|------|-----|-------|-----------------|
| 16-538213 | 179 | 36 | 27  | 28 | 3  | 4  | 13 | 7  | 0.12  | 1    | 1    | 1    | 0.5   | 4    | 0.06 | 2    | 8    | 0.5  | 2    | 0.5  | 4    | 16  | Ped   | the Netherlands |
| 16-540774 | 179 | 36 | 27  | 28 | 3  | 4  | 13 | 7  | 0.25  | 8    | 2    | 1    | 0.5   | 1    | 0.25 | 4    | 1    | 4    | 128  | 8    | 128  | 1   | Ped   | the Netherlands |
| 16-537440 | 189 | 26 | 143 | 1  | 3  | 4  | 4  | 10 | 0.06  | 8    | 4    | 4    | 1     | 16   | 8    | 16   | 32   | 1    | 4    | 1    | 8    | 1   | Ped   | Spain           |
| 16-537451 | 198 | 11 | 5   | 11 | 11 | 3  | 27 | 7  | 0.5   | 8    | 4    | 8    | 1     | 16   | 8    | 8    | 16   | 2    | 4    | 0.5  | 16   | 0.5 | Adult | Spain           |
| 16-537454 | 198 | 11 | 5   | 11 | 11 | 3  | 27 | 7  | 0.5   | 8    | 4    | 4    | 1     | 32   | 8    | 16   | 16   | 2    | 4    | 1    | 8    | 0.5 | Adult | Spain           |
| 16-537483 | 198 | 11 | 5   | 11 | 11 | 3  | 27 | 7  | 0.016 | 0.25 | 1    | 0.25 | 1     | 0.25 | 0.25 | 1    | 1    | 0.12 | 0.12 | 0.25 | 0.12 | 0.5 | Adult | Spain           |
| 16-537484 | 198 | 11 | 5   | 11 | 11 | 3  | 27 | 7  | 0.5   | 2    | 1    | 1    | 0.5   | 0.25 | 0.06 | 0.5  | 0.5  | 0.5  | 64   | 8    | 129  | 1   | Adult | Spain           |
| 16-538225 | 198 | 11 | 5   | 11 | 11 | 3  | 27 | 7  | 0.12  | 8    | 1    | 2    | 1     | 1    | 0.06 | 1    | 0.5  | 1    | 32   | 4    | 64   | 0.5 | Ped   | the Netherlands |
| 16-540775 | 198 | 11 | 5   | 11 | 11 | 3  | 27 | 7  | 0.12  | 2    | 2    | 4    | 0.5   | 8    | 1    | 16   | 16   | 0.25 | 4    | 2    | 32   | 1   | Ped   | the Netherlands |
| 16-555929 | 231 | 6  | 5   | 36 | 63 | 4  | 30 | 2  | 0.12  | 4    | 1    | 1    | 1     | 1    | 0.06 | 1    | 0.5  | 0.5  | 4    | 2    | 16   | 1   | Adult | the Netherlands |
| 16-537342 | 235 | 38 | 11  | 3  | 13 | 1  | 2  | 4  | 0.12  | 4    | 32   | 2    | 2     | 2    | 1    | 1    | 2    | 0.5  | 129  | 128  | 32   | 1   | Ped   | Spain           |
| 16-537445 | 238 | 5  | 1   | 59 | 6  | 1  | 33 | 42 | 8     | 129  | 64   | 16   | 1     | 257  | 2    | 8    | 257  | 4    | 129  | 129  | 128  | 17  | Adult | Spain           |
| 16-537461 | 242 | 28 | 5   | 5  | 11 | 3  | 15 | 44 | 0.06  | 2    | 0.5  | 0.5  | 0.25  | 0.25 | 0.06 | 0.25 | 0.25 | 1    | 2    | 0.25 | 4    | 1   | Adult | Spain           |
| 16-538224 | 244 | 17 | 5   | 12 | 3  | 14 | 4  | 7  | 8     | 2    | 16   | 0.25 | 0.016 | 1    | 4    | 8    | 2    | 2    | 0.12 | 1    | 0.12 | 1   | Ped   | the Netherlands |
| 16-540779 | 244 | 17 | 5   | 12 | 3  | 14 | 4  | 7  | 0.06  | 2    | 2    | 2    | 0.5   | 8    | 1    | 2    | 8    | 0.12 | 4    | 0.5  | 2    | 1   | Ped   | the Netherlands |
| 16-540784 | 244 | 17 | 5   | 12 | 3  | 14 | 4  | 7  | 0.12  | 2    | 2    | 2    | 0.5   | 8    | 1    | 2    | 8    | 0.12 | 2    | 1    | 4    | 1   | Ped   | the Netherlands |
| 16-542607 | 244 | 17 | 5   | 12 | 3  | 14 | 4  | 7  | 0.06  | 0.5  | 1    | 0.5  | 0.5   | 0.25 | 0.25 | 2    | 0.5  | 0.06 | 1    | 0.5  | 2    | 1   | Adult | Australia       |
| 16-537468 | 245 | 39 | 6   | 12 | 11 | 3  | 15 | 2  | 0.06  | 0.25 | 0.25 | 0.25 | 0.12  | 0.25 | 0.06 | 0.25 | 0.5  | 0.5  | 0.25 | 0.12 | 0.25 | 0.5 | Adult | Spain           |
| 16-547151 | 245 | 39 | 6   | 12 | 11 | 3  | 15 | 2  | 0.12  | 8    | 8    | 8    | 1     | 64   | 2    | 2    | 64   | 1    | 1    | 0.5  | 2    | 2   | Adult | the Netherlands |
| 16-547152 | 245 | 39 | 6   | 12 | 11 | 3  | 15 | 2  | 0.06  | 8    | 2    | 2    | 1     | 4    | 0.5  | 1    | 4    | 2    | 1    | 0.25 | 2    | 1   | Adult | the Netherlands |
| 16-547154 | 245 | 39 | 6   | 12 | 11 | 3  | 15 | 2  | 0.06  | 2    | 2    | 4    | 0.5   | 8    | 0.5  | 4    | 16   | 2    | 2    | 0.5  | 2    | 1   | Adult | the Netherlands |
| 16-547155 | 245 | 39 | 6   | 12 | 11 | 3  | 15 | 2  | 0.06  | 4    | 1    | 2    | 0.5   | 4    | 0.5  | 4    | 256  | 2    | 0.5  | 0.5  | 1    | 1   | Adult | the Netherlands |



|           |     |     |    |    |    |    |    |    |      |      |      |      |      |      |      |      |      |      |     |      |     |     |       |                 |
|-----------|-----|-----|----|----|----|----|----|----|------|------|------|------|------|------|------|------|------|------|-----|------|-----|-----|-------|-----------------|
| 16-537526 | 252 | 6   | 28 | 4  | 3  | 3  | 4  | 7  | 0.03 | 2    | 4    | 2    | 0.5  | 4    | 0.12 | 1    | 16   | 0.12 | 1   | 0.5  | 2   | 0.5 |       | Spain           |
| 16-537527 | 252 | 6   | 28 | 4  | 3  | 3  | 4  | 7  | 0.06 | 8    | 2    | 8    | 0.5  | 4    | 0.12 | 2    | 8    | 0.25 | 2   | 0.5  | 4   | 1   |       | Spain           |
| 16-538240 | 252 | 6   | 28 | 4  | 3  | 3  | 4  | 7  | 0.12 | 8    | 2    | 4    | 2    | 8    | 0.12 | 0.5  | 16   | 0.5  | 4   | 1    | 16  | 1   | Ped   | the Netherlands |
| 16-533586 | 253 | 4   | 4  | 16 | 12 | 1  | 6  | 3  | 0.12 | 1    | 0.5  | 2    | 2    | 2    | 0.12 | 0.5  | 1    | 0.5  | 129 | 128  | 129 | 0.5 | Ped   | the Netherlands |
| 16-533588 | 253 | 4   | 4  | 16 | 12 | 1  | 6  | 3  | 0.12 | 2    | 0.5  | 1    | 0.12 | 1    | 0.06 | 0.12 | 0.5  | 4    | 4   | 0.5  | 129 | 0.5 | Ped   | the Netherlands |
| 16-537424 | 253 | 4   | 4  | 16 | 12 | 1  | 6  | 3  | 0.03 | 2    | 0.25 | 0.25 | 0.12 | 2    | 0.06 | 0.12 | 0.25 | 0.25 | 0.5 | 0.12 | 1   | 1   | Adult | Spain           |
| 16-537442 | 253 | 4   | 4  | 16 | 12 | 1  | 6  | 3  | 0.25 | 4    | 1    | 1    | 1    | 1    | 0.12 | 1    | 0.5  | 1    | 129 | 129  | 64  | 1   | Adult | Spain           |
| 16-537478 | 254 | 6   | 5  | 58 | 11 | 3  | 4  | 37 | 0.12 | 2    | 0.5  | 2    | 0.25 | 4    | 0.12 | 1    | 2    | 0.5  | 4   | 1    | 16  | 0.5 | Adult | Spain           |
| 16-538242 | 260 | 14  | 5  | 10 | 7  | 4  | 13 | 7  | 8    | 0.12 | 0.25 | 0.25 | 0.5  | 0.25 | 0.06 | 0.12 | 0.5  | 0.25 | 8   | 2    | 32  | 1   | Ped   | the Netherlands |
| 16-540780 | 260 | 14  | 5  | 10 | 7  | 4  | 13 | 7  | 0.5  | 8    | 2    | 4    | 1    | 32   | 0.5  | 2    | 16   | 2    | 16  | 2    | 16  | 1   | Adult | the Netherlands |
| 16-543367 | 260 | 14  | 5  | 10 | 7  | 4  | 13 | 7  | 0.12 | 16   | 4    | 1    | 0.25 | 16   | 0.12 | 2    | 1    | 0.25 | 8   | 16   | 4   | 1   | Ped   | United Kingdom  |
| 16-546333 | 260 | 14  | 5  | 10 | 7  | 4  | 13 | 7  | 0.12 | 8    | 2    | 2    | 1    | 8    | 0.12 | 0.5  | 8    | 0.12 | 8   | 8    | 16  | 1   | Adult | the Netherlands |
| 16-547164 | 260 | 14  | 5  | 10 | 7  | 4  | 13 | 7  | 0.06 | 2    | 2    | 4    | 0.5  | 4    | 0.25 | 2    | 16   | 0.25 | 2   | 0.5  | 2   | 1   | Adult | the Netherlands |
| 16-548952 | 260 | 14  | 5  | 10 | 7  | 4  | 13 | 7  | 0.25 | 4    | 2    | 2    | 1    | 8    | 1    | 8    | 16   | 4    | 16  | 2    | 16  | 2   | Model | United Kingdom  |
| 16-555937 | 260 | 14  | 5  | 10 | 7  | 4  | 13 | 7  | 0.25 | 0.25 | 4    | 1    | 1    | 0.5  | 0.06 | 2    | 8    | 0.12 | 1   | 0.5  | 4   | 1   | Ped   | the Netherlands |
| 16-538232 | 261 | 105 | 5  | 30 | 3  | 3  | 4  | 14 | 0.12 | 4    | 2    | 2    | 1    | 8    | 1    | 1    | 16   | 0.5  | 1   | 0.25 | 1   | 1   | Ped   | the Netherlands |
| 16-540782 | 261 | 105 | 5  | 30 | 3  | 3  | 4  | 14 | 0.12 | 8    | 4    | 4    | 2    | 64   | 1    | 2    | 32   | 0.5  | 8   | 2    | 32  | 1   | Ped   | the Netherlands |
| 16-537488 | 262 | 17  | 5  | 1  | 3  | 4  | 15 | 7  | 0.12 | 2    | 2    | 4    | 0.5  | 8    | 0.12 | 1    | 16   | 0.12 | 4   | 1    | 8   | 1   | Ped   | Spain           |
| 16-548979 | 262 | 17  | 5  | 1  | 3  | 4  | 15 | 7  | 0.12 | 8    | 1    | 2    | 1    | 1    | 0.12 | 1    | 0.5  | 0.5  | 16  | 2    | 16  | 0.5 | Adult | the Netherlands |
| 16-555927 | 262 | 17  | 5  | 1  | 3  | 4  | 15 | 7  | 0.25 | 16   | 32   | 4    | 0.5  | 257  | 4    | 64   | 64   | 2    | 8   | 2    | 8   | 1   | Adult | the Netherlands |
| 16-540786 | 266 | 16  | 5  | 11 | 72 | 44 | 7  | 52 | 0.06 | 1    | 1    | 2    | 0.5  | 4    | 0.06 | 1    | 4    | 0.25 | 2   | 1    | 4   | 1   | Adult | the Netherlands |
| 16-538340 | 267 | 19  | 5  | 12 | 11 | 11 | 4  | 14 | 0.03 | 2    | 4    | 1    | 1    | 2    | 2    | 0.12 | 2    | 8    | 1   | 2    | 4   | 1   | Adult | the Netherlands |

|           |     |     |    |    |    |    |    |    |      |      |      |      |      |     |      |      |      |      |      |      |     |     |       |                 |
|-----------|-----|-----|----|----|----|----|----|----|------|------|------|------|------|-----|------|------|------|------|------|------|-----|-----|-------|-----------------|
| 16-538341 | 267 | 19  | 5  | 12 | 11 | 11 | 4  | 14 | 0.12 | 1    | 1    | 2    | 0.25 | 2   | 0.06 | 0.12 | 8    | 8    | 0.25 | 0.12 | 4   | 0.5 | Adult | the Netherlands |
| 16-540787 | 267 | 19  | 5  | 12 | 11 | 11 | 4  | 14 | 0.06 | 1    | 2    | 2    | 0.5  | 4   | 1    | 4    | 8    | 0.12 | 0.5  | 0.5  | 1   | 1   | Ped   | the Netherlands |
| 16-537347 | 270 | 22  | 3  | 17 | 5  | 2  | 10 | 7  | 0.03 | 0.25 | 4    | 1    | 0.5  | 2   | 0.06 | 0.5  | 8    | 33   | 2    | 0.5  | 4   | 0.5 | Adult | Spain           |
| 16-540811 | 273 | 104 | 4  | 36 | 71 | 4  | 4  | 53 | 0.12 | 8    | 0.25 | 0.25 | 0.12 | 16  | 0.5  | 8    | 0.25 | 1    | 129  | 4    | 2   | 0.5 | Adult | the Netherlands |
| 16-537340 | 274 | 23  | 5  | 11 | 7  | 1  | 12 | 7  | 0.12 | 8    | 4    | 1    | 1    | 1   | 4    | 32   | 2    | 0.5  | 2    | 0.5  | 8   | 1   | Adult | Spain           |
| 16-537386 | 274 | 23  | 5  | 11 | 7  | 1  | 12 | 7  | 0.12 | 4    | 2    | 1    | 0.5  | 1   | 0.5  | 32   | 0.5  | 1    | 4    | 2    | 16  | 1   | Ped   | Spain           |
| 16-538200 | 274 | 23  | 5  | 11 | 7  | 1  | 12 | 7  | 0.06 | 2    | 2    | 4    | 0.5  | 4   | 0.25 | 1    | 16   | 0.06 | 4    | 1    | 16  | 1   | Ped   | the Netherlands |
| 16-540788 | 274 | 23  | 5  | 11 | 7  | 1  | 12 | 7  | 0.25 | 4    | 1    | 1    | 1    | 1   | 0.06 | 1    | 0.5  | 4    | 4    | 1    | 8   | 0.5 | Adult | the Netherlands |
| 16-555930 | 274 | 23  | 5  | 11 | 7  | 1  | 12 | 7  | 0.12 | 16   | 32   | 2    | 2    | 128 | 0.5  | 8    | 32   | 33   | 16   | 4    | 32  | 1   | Adult | the Netherlands |
| 16-538218 | 281 | 11  | 57 | 1  | 5  | 4  | 4  | 2  | 0.06 | 16   | 1    | 2    | 0.5  | 8   | 0.25 | 1    | 1    | 2    | 0.5  | 0.25 | 1   | 0.5 | Ped   | the Netherlands |
| 16-537375 | 296 | 44  | 8  | 5  | 3  | 15 | 6  | 26 | 0.06 | 0.5  | 1    | 2    | 1    | 4   | 0.12 | 4    | 4    | 1    | 0.5  | 0.25 | 1   | 0.5 | Adult | Spain           |
| 16-538195 | 296 | 44  | 8  | 5  | 3  | 15 | 6  | 26 | 0.25 | 16   | 8    | 8    | 1    | 32  | 4    | 8    | 128  | 0.5  | 16   | 2    | 32  | 1   | Ped   | the Netherlands |
| 16-543349 | 296 | 44  | 8  | 5  | 3  | 15 | 6  | 26 | 0.5  | 1    | 1    | 0.5  | 0.25 | 0.5 | 0.06 | 1    | 0.5  | 8    | 0.5  | 0.25 | 2   | 2   | Adult | United Kingdom  |
| 16-543369 | 296 | 44  | 8  | 5  | 3  | 15 | 6  | 26 | 0.06 | 2    | 2    | 2    | 0.5  | 2   | 0.25 | 16   | 1    | 4    | 0.5  | 0.5  | 2   | 0.5 | Adult | United Kingdom  |
| 16-538197 | 299 | 17  | 5  | 36 | 3  | 3  | 7  | 3  | 0.12 | 4    | 32   | 4    | 1    | 64  | 0.25 | 0.5  | 16   | 0.12 | 4    | 2    | 8   | 0.5 | Ped   | the Netherlands |
| 16-538293 | 299 | 17  | 5  | 36 | 3  | 3  | 7  | 3  | 0.25 | 4    | 8    | 4    | 1    | 64  | 0.5  | 2    | 16   | 0.12 | 8    | 2    | 16  | 1   | Ped   | the Netherlands |
| 16-540796 | 308 | 13  | 4  | 5  | 5  | 12 | 7  | 15 | 0.06 | 0.25 | 0.5  | 0.5  | 0.5  | 0.5 | 0.06 | 1    | 0.5  | 0.03 | 2    | 4    | 2   | 0.5 | Ped   | the Netherlands |
| 16-537452 | 313 | 47  | 8  | 7  | 6  | 8  | 11 | 40 | 0.06 | 8    | 2    | 2    | 1    | 4   | 0.06 | 1    | 8    | 0.12 | 4    | 1    | 16  | 1   | Adult | Spain           |
| 16-537472 | 313 | 47  | 8  | 7  | 6  | 8  | 11 | 40 | 1    | 64   | 64   | 8    | 8    | 8   | 16   | 8    | 32   | 1    | 129  | 16   | 128 | 2   | Adult | Spain           |
| 16-543380 | 313 | 47  | 8  | 7  | 6  | 8  | 11 | 40 | 0.12 | 32   | 64   | 2    | 4    | 257 | 0.25 | 4    | 257  | 4    | 64   | 16   | 128 | 1   | Adult | United Kingdom  |
| 16-537441 | 316 | 13  | 8  | 9  | 3  | 1  | 6  | 9  | 0.06 | 0.5  | 0.25 | 0.5  | 0.25 | 1   | 0.06 | 0.25 | 2    | 0.06 | 0.5  | 0.12 | 1   | 1   | Ped   | Spain           |
| 16-540809 | 316 | 13  | 8  | 9  | 3  | 1  | 6  | 9  | 0.06 | 4    | 1    | 2    | 0.5  | 8   | 0.12 | 2    | 8    | 8    | 2    | 0.5  | 4   | 1   | Adult | the Netherlands |

|           |     |    |    |    |    |    |    |    |      |      |     |      |      |      |      |      |      |      |      |      |      |     |       |                 |
|-----------|-----|----|----|----|----|----|----|----|------|------|-----|------|------|------|------|------|------|------|------|------|------|-----|-------|-----------------|
| 16-538189 | 319 | 5  | 4  | 3  | 3  | 1  | 11 | 8  | 0.06 | 2    | 1   | 2    | 0.5  | 32   | 0.12 | 1    | 16   | 0.12 | 4    | 1    | 4    | 4   | Ped   | the Netherlands |
| 16-538247 | 319 | 5  | 4  | 3  | 3  | 1  | 11 | 8  | 0.25 | 2    | 0.5 | 0.25 | 0.5  | 0.25 | 0.06 | 0.5  | 0.5  | 0.03 | 4    | 0.5  | 8    | 0.5 | Ped   | the Netherlands |
| 16-538226 | 348 | 22 | 20 | 11 | 3  | 3  | 3  | 7  | 0.06 | 1    | 1   | 1    | 0.5  | 4    | 0.5  | 4    | 8    | 0.12 | 1    | 0.5  | 2    | 1   | Ped   | the Netherlands |
| 16-538344 | 348 | 22 | 20 | 11 | 3  | 3  | 3  | 7  | 0.5  | 8    | 2   | 2    | 1    | 1    | 0.12 | 1    | 257  | 8    | 129  | 128  | 129  | 8   | Adult | the Netherlands |
| 16-540789 | 348 | 22 | 20 | 11 | 3  | 3  | 3  | 7  | 0.12 | 4    | 4   | 2    | 0.25 | 64   | 4    | 8    | 8    | 1    | 2    | 0.5  | 4    | 1   | Ped   | the Netherlands |
| 16-537463 | 360 | 15 | 5  | 36 | 11 | 27 | 4  | 2  | 1    | 8    | 4   | 0.5  | 2    | 8    | 2    | 4    | 8    | 1    | 8    | 2    | 16   | 1   | Adult | Spain           |
| 16-540824 | 365 | 27 | 11 | 5  | 3  | 1  | 6  | 64 | 0.06 | 16   | 8   | 8    | 2    | 4    | 0.06 | 1    | 2    | 16   | 2    | 0.5  | 2    | 0.5 | Adult | the Netherlands |
| 16-537376 | 379 | 39 | 5  | 11 | 28 | 4  | 4  | 63 | 0.06 | 2    | 1   | 2    | 0.5  | 8    | 0.25 | 0.5  | 2    | 0.06 | 1    | 0.5  | 2    | 1   | Ped   | Spain           |
| 16-538192 | 379 | 39 | 5  | 11 | 28 | 4  | 4  | 63 | 0.12 | 8    | 2   | 4    | 1    | 8    | 0.5  | 2    | 16   | 1    | 4    | 1    | 16   | 1   | Ped   | the Netherlands |
| 16-538283 | 381 | 11 | 20 | 1  | 65 | 4  | 4  | 10 | 0.06 | 2    | 2   | 4    | 0.5  | 8    | 0.25 | 1    | 16   | 0.12 | 1    | 0.5  | 2    | 4   | Adult | the Netherlands |
| 16-547171 | 381 | 11 | 20 | 1  | 65 | 4  | 4  | 10 | 0.06 | 4    | 8   | 2    | 0.5  | 8    | 0.06 | 1    | 32   | 0.25 | 2    | 0.5  | 8    | 0.5 | Adult | the Netherlands |
| 16-555871 | 381 | 11 | 20 | 1  | 65 | 4  | 4  | 10 | 0.06 | 2    | 2   | 2    | 0.5  | 8    | 0.06 | 4    | 16   | 0.12 | 2    | 1    | 4    | 1   | Adult | the Netherlands |
| 16-537341 | 385 | 15 | 5  | 5  | 5  | 50 | 4  | 14 | 0.03 | 0.12 | 0.5 | 0.5  | 0.25 | 0.5  | 0.06 | 0.5  | 0.5  | 0.03 | 0.25 | 0.25 | 0.12 | 0.5 | Adult | Spain           |
| 16-537429 | 385 | 15 | 5  | 5  | 5  | 50 | 4  | 14 | 0.06 | 32   | 128 | 8    | 8    | 128  | 16   | 64   | 64   | 2    | 8    | 4    | 64   | 1   | Adult | Spain           |
| 16-547158 | 389 | 17 | 22 | 5  | 3  | 1  | 14 | 3  | 0.5  | 8    | 4   | 4    | 1    | 16   | 0.5  | 0.5  | 64   | 4    | 16   | 4    | 32   | 1   | Adult | the Netherlands |
| 16-547160 | 389 | 17 | 22 | 5  | 3  | 1  | 14 | 3  | 0.5  | 16   | 8   | 4    | 2    | 32   | 4    | 0.25 | 64   | 2    | 16   | 4    | 16   | 1   | Adult | the Netherlands |
| 16-540790 | 390 | 39 | 5  | 1  | 3  | 4  | 46 | 56 | 0.12 | 16   | 256 | 8    | 4    | 257  | 16   | 32   | 128  | 1    | 8    | 8    | 32   | 0.5 | Ped   | the Netherlands |
| 16-537339 | 395 | 6  | 5  | 1  | 1  | 1  | 12 | 1  | 0.12 | 2    | 2   | 0.25 | 1    | 0.25 | 0.12 | 0.25 | 1    | 0.5  | 2    | 2    | 129  | 0.5 | Adult | Spain           |
| 16-537350 | 395 | 6  | 5  | 1  | 1  | 1  | 12 | 1  | 0.03 | 4    | 0.5 | 1    | 0.25 | 4    | 0.12 | 0.5  | 0.25 | 2    | 0.25 | 0.12 | 4    | 0.5 | Adult | Spain           |
| 16-537363 | 395 | 6  | 5  | 1  | 1  | 1  | 12 | 1  | 0.06 | 1    | 2   | 2    | 0.25 | 4    | 0.25 | 1    | 8    | 0.06 | 0.25 | 0.25 | 1    | 1   | Ped   | Spain           |
| 16-537366 | 395 | 6  | 5  | 1  | 1  | 1  | 12 | 1  | 0.12 | 2    | 4   | 4    | 1    | 8    | 1    | 1    | 16   | 8    | 2    | 32   | 4    | 17  | Adult | Spain           |
| 16-538207 | 395 | 6  | 5  | 1  | 1  | 1  | 12 | 1  | 0.25 | 8    | 2   | 2    | 1    | 1    | 0.5  | 16   | 1    | 0.5  | 16   | 2    | 32   | 1   | Ped   | the Netherlands |

|           |     |    |   |    |   |   |    |   |      |      |      |      |      |      |      |    |     |      |     |      |     |     |       |                 |
|-----------|-----|----|---|----|---|---|----|---|------|------|------|------|------|------|------|----|-----|------|-----|------|-----|-----|-------|-----------------|
| 16-538289 | 395 | 6  | 5 | 1  | 1 | 1 | 12 | 1 | 0.06 | 2    | 1    | 1    | 0.5  | 2    | 0.12 | 1  | 0.5 | 0.5  | 1   | 0.25 | 2   | 0.5 | Adult | the Netherlands |
| 16-540791 | 395 | 6  | 5 | 1  | 1 | 1 | 12 | 1 | 16   | 2    | 0.5  | 1    | 0.12 | 0.25 | 0.25 | 2  | 1   | 0.06 | 32  | 8    | 129 | 2   | Ped   | the Netherlands |
| 16-538191 | 406 | 40 | 5 | 11 | 3 | 4 | 13 | 7 | 0.25 | 16   | 4    | 4    | 1    | 4    | 8    | 32 | 8   | 2    | 32  | 8    | 64  | 1   | Ped   | the Netherlands |
| 16-538201 | 406 | 40 | 5 | 11 | 3 | 4 | 13 | 7 | 17   | 4    | 1    | 0.5  | 0.25 | 0.5  | 0.5  | 1  | 2   | 1    | 4   | 1    | 8   | 1   | Ped   | the Netherlands |
| 16-538279 | 406 | 40 | 5 | 11 | 3 | 4 | 13 | 7 | 0.5  | 4    | 1    | 1    | 1    | 0.5  | 1    | 16 | 0.5 | 4    | 16  | 2    | 32  | 0.5 | Adult | the Netherlands |
| 16-538281 | 406 | 40 | 5 | 11 | 3 | 4 | 13 | 7 | 0.25 | 4    | 4    | 0.25 | 1    | 0.5  | 16   | 32 | 8   | 0.03 | 8   | 0.5  | 16  | 0.5 | Adult | the Netherlands |
| 16-538288 | 406 | 40 | 5 | 11 | 3 | 4 | 13 | 7 | 17   | 0.12 | 0.25 | 0.25 | 0.25 | 0.25 | 0.25 | 2  | 0.5 | 0.5  | 16  | 0.25 | 64  | 0.5 | Adult | the Netherlands |
| 16-538291 | 406 | 40 | 5 | 11 | 3 | 4 | 13 | 7 | 0.5  | 2    | 0.25 | 1    | 0.5  | 0.5  | 0.06 | 1  | 1   | 2    | 8   | 2    | 32  | 0.5 | Adult | the Netherlands |
| 16-538296 | 406 | 40 | 5 | 11 | 3 | 4 | 13 | 7 | 0.12 | 64   | 256  | 16   | 8    | 257  | 32   | 64 | 257 | 8    | 8   | 2    | 16  | 1   | Adult | the Netherlands |
| 16-538298 | 406 | 40 | 5 | 11 | 3 | 4 | 13 | 7 | 16   | 2    | 1    | 0.5  | 0.5  | 0.25 | 1    | 16 | 1   | 2    | 16  | 4    | 32  | 1   | Adult | the Netherlands |
| 16-538309 | 406 | 40 | 5 | 11 | 3 | 4 | 13 | 7 | 4    | 32   | 64   | 4    | 4    | 2    | 32   | 64 | 128 | 4    | 64  | 8    | 64  | 1   | Adult | the Netherlands |
| 16-538311 | 406 | 40 | 5 | 11 | 3 | 4 | 13 | 7 | 1    | 16   | 256  | 0.25 | 8    | 0.25 | 16   | 32 | 64  | 8    | 128 | 32   | 129 | 0.5 | Adult | the Netherlands |
| 16-538317 | 406 | 40 | 5 | 11 | 3 | 4 | 13 | 7 | 0.12 | 8    | 2    | 2    | 2    | 16   | 32   | 64 | 4   | 2    | 4   | 1    | 16  | 1   | Adult | the Netherlands |
| 16-538318 | 406 | 40 | 5 | 11 | 3 | 4 | 13 | 7 | 0.12 | 16   | 64   | 8    | 2    | 128  | 8    | 32 | 4   | 4    | 32  | 2    | 16  | 1   | Adult | the Netherlands |
| 16-538320 | 406 | 40 | 5 | 11 | 3 | 4 | 13 | 7 | 8    | 16   | 64   | 1    | 4    | 1    | 16   | 64 | 256 | 4    | 8   | 1    | 16  | 1   | Adult | the Netherlands |
| 16-540792 | 406 | 40 | 5 | 11 | 3 | 4 | 13 | 7 | 4    | 4    | 1    | 1    | 0.5  | 0.5  | 8    | 32 | 2   | 2    | 4   | 1    | 8   | 1   | Adult | the Netherlands |
| 16-540793 | 406 | 40 | 5 | 11 | 3 | 4 | 13 | 7 | 0.12 | 8    | 4    | 2    | 2    | 1    | 0.5  | 2  | 16  | 8    | 16  | 4    | 32  | 1   | Ped   | the Netherlands |
| 16-540794 | 406 | 40 | 5 | 11 | 3 | 4 | 13 | 7 | 0.12 | 8    | 4    | 4    | 1    | 2    | 8    | 8  | 8   | 2    | 16  | 2    | 64  | 0.5 | Ped   | the Netherlands |
| 16-540827 | 406 | 40 | 5 | 11 | 3 | 4 | 13 | 7 | 0.25 | 8    | 16   | 2    | 1    | 0.5  | 32   | 64 | 16  | 2    | 128 | 32   | 128 | 1   | Adult | the Netherlands |
| 16-540829 | 406 | 40 | 5 | 11 | 3 | 4 | 13 | 7 | 0.12 | 8    | 2    | 2    | 1    | 1    | 8    | 16 | 4   | 16   | 16  | 2    | 32  | 0.5 | Adult | the Netherlands |
| 16-540892 | 406 | 40 | 5 | 11 | 3 | 4 | 13 | 7 | 1    | 8    | 4    | 1    | 1    | 0.5  | 16   | 32 | 4   | 4    | 64  | 64   | 64  | 2   | Ped   | the Netherlands |
| 16-540893 | 406 | 40 | 5 | 11 | 3 | 4 | 13 | 7 | 8    | 16   | 16   | 2    | 1    | 2    | 16   | 64 | 8   | 16   | 32  | 16   | 64  | 1   | Ped   | the Netherlands |

|           |     |     |    |    |    |    |    |    |      |      |      |      |      |      |      |      |      |      |     |      |      |     |       |                 |
|-----------|-----|-----|----|----|----|----|----|----|------|------|------|------|------|------|------|------|------|------|-----|------|------|-----|-------|-----------------|
| 16-540896 | 406 | 40  | 5  | 11 | 3  | 4  | 13 | 7  | 0.5  | 16   | 8    | 8    | 4    | 4    | 64   | 64   | 16   | 4    | 64  | 16   | 128  | 0.5 | Adult | the Netherlands |
| 16-540897 | 406 | 40  | 5  | 11 | 3  | 4  | 13 | 7  | 0.5  | 64   | 128  | 8    | 4    | 257  | 32   | 128  | 128  | 2    | 128 | 8    | 129  | 1   | Adult | the Netherlands |
| 16-540902 | 406 | 40  | 5  | 11 | 3  | 4  | 13 | 7  | 16   | 4    | 1    | 0.5  | 0.5  | 0.5  | 4    | 64   | 4    | 4    | 8   | 2    | 16   | 2   | Adult | the Netherlands |
| 16-540903 | 406 | 40  | 5  | 11 | 3  | 4  | 13 | 7  | 0.12 | 8    | 32   | 2    | 1    | 4    | 0.5  | 4    | 32   | 8    | 8   | 16   | 16   | 1   | Adult | the Netherlands |
| 16-540904 | 406 | 40  | 5  | 11 | 3  | 4  | 13 | 7  | 0.25 | 4    | 4    | 2    | 1    | 2    | 16   | 32   | 2    | 32   | 32  | 16   | 64   | 1   | Adult | the Netherlands |
| 16-547168 | 406 | 40  | 5  | 11 | 3  | 4  | 13 | 7  | 0.25 | 16   | 64   | 8    | 2    | 257  | 1    | 4    | 64   | 8    | 16  | 4    | 32   | 1   | Adult | the Netherlands |
| 16-547173 | 406 | 40  | 5  | 11 | 3  | 4  | 13 | 7  | 0.12 | 16   | 8    | 0.5  | 2    | 4    | 8    | 32   | 2    | 2    | 8   | 2    | 32   | 0.5 | Adult | the Netherlands |
| 16-548988 | 406 | 40  | 5  | 11 | 3  | 4  | 13 | 7  | 0.25 | 8    | 2    | 2    | 1    | 2    | 0.06 | 0.5  | 1    | 4    | 16  | 2    | 32   | 1   | Adult | the Netherlands |
| 16-555924 | 406 | 40  | 5  | 11 | 3  | 4  | 13 | 7  | 1    | 16   | 8    | 2    | 2    | 2    | 16   | 64   | 4    | 8    | 32  | 4    | 32   | 0.5 | Adult | the Netherlands |
| 16-555925 | 406 | 40  | 5  | 11 | 3  | 4  | 13 | 7  | 2    | 4    | 1    | 2    | 2    | 0.5  | 0.06 | 0.5  | 1    | 2    | 32  | 4    | 32   | 0.5 | Adult | the Netherlands |
| 16-538290 | 439 | 6   | 68 | 20 | 11 | 4  | 4  | 7  | 2    | 16   | 64   | 32   | 0.5  | 4    | 32   | 32   | 128  | 16   | 8   | 4    | 32   | 0.5 | Adult | the Netherlands |
| 16-543353 | 439 | 6   | 68 | 20 | 11 | 4  | 4  | 7  | 0.25 | 0.12 | 2    | 0.25 | 0.12 | 0.25 | 0.12 | 1    | 1    | 8    | 2   | 2    | 2    | 0.5 | Adult | United Kingdom  |
| 16-538203 | 480 | 11  | 5  | 11 | 3  | 1  | 6  | 27 | 0.12 | 8    | 0.5  | 1    | 0.12 | 1    | 0.06 | 0.25 | 0.5  | 0.06 | 4   | 0.5  | 8    | 1   | Ped   | the Netherlands |
| 16-538299 | 480 | 11  | 5  | 11 | 3  | 1  | 6  | 27 | 0.06 | 2    | 1    | 1    | 0.25 | 0.5  | 0.06 | 1    | 0.5  | 1    | 129 | 128  | 129  | 1   | Adult | the Netherlands |
| 16-538300 | 480 | 11  | 5  | 11 | 3  | 1  | 6  | 27 | 0.06 | 4    | 0.5  | 1    | 0.25 | 0.5  | 0.06 | 0.5  | 0.25 | 1    | 128 | 32   | 129  | 1   | Adult | the Netherlands |
| 16-543370 | 483 | 116 | 5  | 6  | 5  | 3  | 12 | 68 | 0.5  | 1    | 0.25 | 0.25 | 2    | 0.25 | 0.06 | 0.12 | 0.25 | 1    | 16  | 8    | 32   | 0.5 | Adult | United Kingdom  |
| 16-540797 | 484 | 40  | 5  | 11 | 82 | 4  | 13 | 7  | 0.5  | 16   | 2    | 2    | 1    | 1    | 2    | 2    | 1    | 2    | 32  | 4    | 32   | 1   | Ped   | the Netherlands |
| 16-540798 | 485 | 11  | 76 | 5  | 3  | 61 | 14 | 3  | 0.12 | 4    | 0.5  | 1    | 0.5  | 2    | 0.06 | 0.25 | 0.5  | 8    | 0.5 | 0.12 | 0.25 | 1   | Ped   | the Netherlands |
| 16-538198 | 487 | 11  | 5  | 6  | 18 | 4  | 15 | 19 | 4    | 2    | 0.25 | 2    | 0.12 | 2    | 0.06 | 0.25 | 0.25 | 1    | 2   | 0.25 | 4    | 4   | Ped   | the Netherlands |
| 16-540799 | 488 | 16  | 27 | 11 | 5  | 4  | 38 | 7  | 0.25 | 8    | 4    | 8    | 1    | 32   | 4    | 1    | 16   | 2    | 8   | 2    | 16   | 1   | Ped   | the Netherlands |
| 16-538245 | 491 | 16  | 55 | 7  | 61 | 1  | 4  | 45 | 0.5  | 4    | 2    | 1    | 1    | 4    | 0.5  | 4    | 2    | 4    | 2   | 1    | 4    | 2   | Ped   | the Netherlands |
| 16-540890 | 491 | 16  | 55 | 7  | 61 | 1  | 4  | 45 | 0.06 | 4    | 2    | 2    | 1    | 4    | 1    | 4    | 8    | 8    | 4   | 0.5  | 4    | 1   | Ped   | the Netherlands |

|           |     |    |    |    |    |   |    |    |      |      |      |     |      |     |      |     |      |      |      |      |      |     |       |                 |                 |
|-----------|-----|----|----|----|----|---|----|----|------|------|------|-----|------|-----|------|-----|------|------|------|------|------|-----|-------|-----------------|-----------------|
| 16-540891 | 491 | 16 | 55 | 7  | 61 | 1 | 4  | 45 | 2    |      | 8    | 4   | 1    | 0.5 | 2    | 0.5 | 4    | 2    | 8    | 8    | 2    | 16  | 8     | Ped             | the Netherlands |
| 16-540801 | 492 | 40 | 5  | 30 | 61 | 1 | 7  | 14 | 0.12 | 0.25 | 1    | 1   | 0.25 | 1   | 0.5  | 1   | 4    | 4    | 2    | 0.25 | 4    | 0.5 | Adult | the Netherlands |                 |
| 16-555917 | 492 | 40 | 5  | 30 | 61 | 1 | 7  | 14 | 0.25 | 1    | 64   | 1   | 0.25 | 1   | 4    | 32  | 32   | 8    | 8    | 2    | 32   | 2   | Adult | the Netherlands |                 |
| 16-555926 | 492 | 40 | 5  | 30 | 61 | 1 | 7  | 14 | 17   | 8    | 2    | 1   | 2    | 1   | 8    | 64  | 2    | 8    | 129  | 64   | 129  | 1   | Adult | the Netherlands |                 |
| 16-537485 | 496 | 6  | 5  | 26 | 3  | 3 | 38 | 61 | 0.12 | 0.5  | 4    | 2   | 1    | 2   | 1    | 2   | 16   | 4    | 2    | 2    | 8    | 1   | Adult | Spain           |                 |
| 16-540804 | 496 | 6  | 5  | 26 | 3  | 3 | 38 | 61 | 0.12 | 4    | 1    | 2   | 0.5  | 0.5 | 0.06 | 2   | 1    | 0.25 | 4    | 1    | 8    | 1   | Ped   | the Netherlands |                 |
| 16-538186 | 497 | 11 | 5  | 1  | 7  | 3 | 56 | 7  | 1    | 16   | 0.25 | 0.5 | 2    | 2   | 8    | 8   | 0.25 | 1    | 129  | 129  | 129  | 8   | Ped   | the Netherlands |                 |
| 16-538294 | 497 | 11 | 5  | 1  | 7  | 3 | 56 | 7  | 2    | 128  | 256  | 16  | 257  | 64  | 2    | 1   | 256  | 16   | 129  | 128  | 129  | 2   | Adult | the Netherlands |                 |
| 16-540805 | 497 | 11 | 5  | 1  | 7  | 3 | 56 | 7  | 0.03 | 129  | 257  | 8   | 257  | 128 | 1    | 1   | 256  | 8    | 129  | 129  | 129  | 0.5 | Adult | the Netherlands |                 |
| 16-540830 | 497 | 11 | 5  | 1  | 7  | 3 | 56 | 7  | 2    | 8    | 4    | 2   | 2    | 2   | 0.25 | 1   | 2    | 33   | 129  | 64   | 129  | 16  | Adult | the Netherlands |                 |
| 16-548985 | 497 | 11 | 5  | 1  | 7  | 3 | 56 | 7  | 1    | 8    | 1    | 1   | 1    | 4   | 0.12 | 2   | 1    | 2    | 1    | 0.25 | 2    | 0.5 | Adult | the Netherlands |                 |
| 16-540806 | 498 | 6  | 28 | 65 | 3  | 3 | 4  | 7  | 0.06 | 1    | 2    | 2   | 1    | 1   | 0.06 | 1   | 1    | 1    | 4    | 1    | 16   | 1   | Ped   | the Netherlands |                 |
| 16-537380 | 499 | 11 | 5  | 7  | 27 | 2 | 7  | 33 | 0.25 | 4    | 2    | 1   | 1    | 2   | 0.25 | 1   | 1    | 8    | 4    | 2    | 8    | 0.5 | Adult | Spain           |                 |
| 16-538208 | 499 | 11 | 5  | 7  | 27 | 2 | 7  | 33 | 0.03 | 1    | 4    | 2   | 0.5  | 4   | 0.12 | 0.5 | 32   | 0.25 | 1    | 0.5  | 2    | 1   | Ped   | the Netherlands |                 |
| 16-540807 | 499 | 11 | 5  | 7  | 27 | 2 | 7  | 33 | 0.25 | 8    | 32   | 4   | 0.5  | 256 | 16   | 32  | 32   | 1    | 4    | 2    | 8    | 1   | Adult | the Netherlands |                 |
| 16-537465 | 500 | 11 | 57 | 7  | 3  | 4 | 15 | 1  | 0.25 | 8    | 4    | 4   | 1    | 4   | 0.25 | 2   | 16   | 0.5  | 8    | 2    | 16   | 1   | Adult | Spain           |                 |
| 16-540808 | 500 | 11 | 57 | 7  | 3  | 4 | 15 | 1  | 0.06 | 2    | 1    | 1   | 0.5  | 4   | 0.12 | 2   | 0.5  | 8    | 0.12 | 0.12 | 0.25 | 1   | Adult | the Netherlands |                 |
| 16-538326 | 505 | 6  | 20 | 1  | 11 | 4 | 4  | 2  | 0.12 | 4    | 0.25 | 0.5 | 0.25 | 0.5 | 0.12 | 2   | 0.25 | 2    | 4    | 1    | 16   | 1   | Adult | the Netherlands |                 |
| 16-538301 | 506 | 15 | 84 | 12 | 5  | 5 | 13 | 1  | 0.12 | 8    | 2    | 2   | 0.5  | 4   | 0.06 | 2   | 1    | 16   | 1    | 0.25 | 2    | 0.5 | Adult | the Netherlands |                 |
| 16-538302 | 506 | 15 | 84 | 12 | 5  | 5 | 13 | 1  | 4    | 8    | 16   | 4   | 2    | 64  | 4    | 32  | 4    | 33   | 2    | 1    | 0.25 | 0.5 | Adult | the Netherlands |                 |
| 16-538303 | 506 | 15 | 84 | 12 | 5  | 5 | 13 | 1  | 8    | 8    | 16   | 2   | 2    | 16  | 16   | 64  | 16   | 33   | 1    | 1    | 2    | 1   | Adult | the Netherlands |                 |
| 16-540898 | 506 | 15 | 84 | 12 | 5  | 5 | 13 | 1  | 0.12 | 4    | 8    | 2   | 1    | 8   | 2    | 16  | 32   | 0.5  | 8    | 1    | 16   | 1   | Adult | the Netherlands |                 |

|           |     |     |    |    |    |   |    |    |      |     |     |      |      |      |      |     |     |      |      |      |     |     |       |                 |
|-----------|-----|-----|----|----|----|---|----|----|------|-----|-----|------|------|------|------|-----|-----|------|------|------|-----|-----|-------|-----------------|
| 16-537435 | 508 | 15  | 5  | 11 | 3  | 2 | 4  | 3  | 0.12 | 8   | 64  | 2    | 1    | 0.25 | 4    | 32  | 257 | 2    | 4    | 2    | 16  | 0.5 | Adult | Spain           |
| 16-537436 | 508 | 15  | 5  | 11 | 3  | 2 | 4  | 3  | 0.12 | 16  | 64  | 0.25 | 4    | 16   | 16   | 2   | 128 | 8    | 129  | 64   | 129 | 1   | Adult | Spain           |
| 16-537438 | 508 | 15  | 5  | 11 | 3  | 2 | 4  | 3  | 0.12 | 4   | 2   | 0.5  | 0.12 | 0.5  | 1    | 8   | 1   | 1    | 4    | 1    | 8   | 0.5 | Adult | Spain           |
| 16-537449 | 508 | 15  | 5  | 11 | 3  | 2 | 4  | 3  | 0.12 | 4   | 16  | 1    | 1    | 4    | 0.12 | 1   | 32  | 0.5  | 8    | 4    | 32  | 1   | Adult | Spain           |
| 16-537450 | 508 | 15  | 5  | 11 | 3  | 2 | 4  | 3  | 0.25 | 16  | 4   | 4    | 1    | 2    | 0.5  | 1   | 4   | 8    | 4    | 1    | 8   | 0.5 | Adult | Spain           |
| 16-537476 | 508 | 15  | 5  | 11 | 3  | 2 | 4  | 3  | 0.06 | 4   | 2   | 2    | 0.5  | 4    | 1    | 8   | 8   | 4    | 0.25 | 2    | 2   | 0.5 | Adult | Spain           |
| 16-537512 | 508 | 15  | 5  | 11 | 3  | 2 | 4  | 3  | 0.06 | 2   | 2   | 2    | 0.5  | 4    | 0.25 | 1   | 8   | 0.12 | 1    | 0.5  | 1   | 1   |       | Spain           |
| 16-537514 | 508 | 15  | 5  | 11 | 3  | 2 | 4  | 3  | 0.06 | 8   | 2   | 8    | 0.5  | 8    | 0.12 | 1   | 16  | 0.12 | 1    | 0.5  | 2   | 0.5 |       | Spain           |
| 16-537515 | 508 | 15  | 5  | 11 | 3  | 2 | 4  | 3  | 0.12 | 16  | 1   | 32   | 1    | 1    | 0.06 | 1   | 1   | 0.25 | 4    | 1    | 16  | 0.5 |       | Spain           |
| 16-537516 | 508 | 15  | 5  | 11 | 3  | 2 | 4  | 3  | 0.12 | 4   | 2   | 2    | 1    | 1    | 0.06 | 1   | 1   | 0.25 | 4    | 1    | 8   | 0.5 |       | Spain           |
| 16-537517 | 508 | 15  | 5  | 11 | 3  | 2 | 4  | 3  | 0.06 | 4   | 1   | 4    | 0.5  | 2    | 0.06 | 1   | 0.5 | 0.5  | 1    | 0.25 | 2   | 1   |       | Spain           |
| 16-540810 | 508 | 15  | 5  | 11 | 3  | 2 | 4  | 3  | 0.5  | 32  | 257 | 4    | 4    | 257  | 16   | 32  | 128 | 16   | 8    | 4    | 16  | 1   | Adult | the Netherlands |
| 16-540812 | 511 | 6   | 85 | 1  | 5  | 1 | 4  | 68 | 8    | 129 | 128 | 32   | 4    | 257  | 16   | 64  | 16  | 16   | 129  | 64   | 129 | 17  | Adult | the Netherlands |
| 16-540814 | 513 | 117 | 5  | 32 | 3  | 4 | 25 | 75 | 8    | 16  | 4   | 2    | 1    | 32   | 2    | 8   | 8   | 8    | 32   | 4    | 32  | 4   | Adult | the Netherlands |
| 16-540815 | 514 | 1   | 5  | 32 | 3  | 4 | 25 | 3  | 1    | 32  | 128 | 16   | 4    | 257  | 8    | 32  | 257 | 2    | 32   | 4    | 32  | 1   | Adult | the Netherlands |
| 16-540823 | 521 | 28  | 88 | 1  | 21 | 3 | 53 | 7  | 0.5  | 32  | 128 | 2    | 2    | 257  | 4    | 32  | 128 | 1    | 32   | 4    | 32  | 1   | Adult | the Netherlands |
| 16-540826 | 525 | 16  | 5  | 5  | 11 | 2 | 10 | 10 | 1    | 2   | 1   | 1    | 0.25 | 2    | 0.12 | 2   | 4   | 1    | 16   | 8    | 32  | 4   | Adult | the Netherlands |
| 16-538211 | 537 | 5   | 1  | 25 | 88 | 1 | 1  | 42 | 0.06 | 4   | 1   | 1    | 0.5  | 8    | 0.25 | 0.5 | 2   | 2    | 0.25 | 0.12 | 0.5 | 1   | Ped   | the Netherlands |
| 16-540894 | 537 | 5   | 1  | 25 | 88 | 1 | 1  | 42 | 0.12 | 16  | 4   | 4    | 2    | 16   | 1    | 2   | 8   | 4    | 1    | 0.5  | 2   | 1   | Ped   | the Netherlands |
| 16-538328 | 549 | 7   | 5  | 12 | 3  | 4 | 1  | 7  | 2    | 8   | 1   | 0.5  | 0.5  | 4    | 1    | 4   | 2   | 0.5  | 8    | 1    | 16  | 0.5 | Adult | the Netherlands |
| 16-543339 | 549 | 7   | 5  | 12 | 3  | 4 | 1  | 7  | 0.12 | 8   | 1   | 1    | 1    | 1    | 0.06 | 1   | 0.5 | 2    | 4    | 1    | 8   | 0.5 | Adult | United Kingdom  |
| 16-547167 | 549 | 7   | 5  | 12 | 3  | 4 | 1  | 7  | 0.5  | 32  | 4   | 16   | 2    | 16   | 4    | 2   | 16  | 0.12 | 8    | 0.5  | 8   | 1   | Adult | the Netherlands |

|           |     |     |     |    |    |    |    |    |      |  |     |     |     |     |      |      |      |      |      |     |      |    |     |       |                 |
|-----------|-----|-----|-----|----|----|----|----|----|------|--|-----|-----|-----|-----|------|------|------|------|------|-----|------|----|-----|-------|-----------------|
| 16-537460 | 550 | 119 | 10  | 3  | 5  | 64 | 6  | 77 | 4    |  | 64  | 2   | 4   | 2   | 32   | 32   | 32   | 257  | 4    | 8   | 4    | 16 | 0.5 | Adult | Spain           |
| 16-548990 | 550 | 119 | 10  | 3  | 5  | 64 | 6  | 77 | 0.12 |  | 16  | 2   | 2   | 4   | 2    | 0.12 | 1    | 1    | 0.25 | 8   | 0.5  | 16 | 1   | Adult | the Netherlands |
| 16-548992 | 550 | 119 | 10  | 3  | 5  | 64 | 6  | 77 | 0.12 |  | 8   | 0.5 | 1   | 1   | 0.5  | 0.06 | 0.5  | 0.5  | 0.25 | 4   | 0.5  | 16 | 1   | Adult | the Netherlands |
| 16-547178 | 553 | 17  | 5   | 1  | 11 | 4  | 4  | 45 | 0.06 |  | 4   | 2   | 1   | 0.5 | 2    | 0.06 | 0.25 | 1    | 4    | 0.5 | 0.25 | 1  | 0.5 | Adult | the Netherlands |
| 16-547180 | 553 | 17  | 5   | 1  | 11 | 4  | 4  | 45 | 0.06 |  | 4   | 16  | 1   | 0.5 | 2    | 0.25 | 2    | 4    | 8    | 0.5 | 4    | 2  | 0.5 | Adult | the Netherlands |
| 16-537379 | 560 | 5   | 5   | 57 | 13 | 1  | 40 | 3  | 0.06 |  | 8   | 4   | 4   | 2   | 8    | 8    | 64   | 16   | 4    | 1   | 0.5  | 4  | 1   | Adult | Spain           |
| 16-537388 | 564 | 6   | 10  | 5  | 11 | 2  | 15 | 2  | 0.25 |  | 4   | 1   | 1   | 0.5 | 0.5  | 0.06 | 0.5  | 0.5  | 0.5  | 8   | 2    | 16 | 0.5 | Adult | Spain           |
| 16-537389 | 564 | 6   | 10  | 5  | 11 | 2  | 15 | 2  | 0.12 |  | 8   | 1   | 1   | 0.5 | 1    | 0.06 | 0.5  | 0.5  | 0.5  | 8   | 1    | 16 | 0.5 | Adult | Spain           |
| 16-537455 | 569 | 11  | 5   | 11 | 11 | 3  | 6  | 27 | 0.12 |  | 2   | 1   | 1   | 1   | 4    | 0.25 | 1    | 1    | 4    | 1   | 0.25 | 2  | 1   | Adult | Spain           |
| 16-537481 | 569 | 11  | 5   | 11 | 11 | 3  | 6  | 27 | 0.25 |  | 2   | 1   | 1   | 0.5 | 2    | 0.06 | 1    | 0.5  | 4    | 0.5 | 0.12 | 1  | 0.5 | Adult | Spain           |
| 16-543343 | 569 | 11  | 5   | 11 | 11 | 3  | 6  | 27 | 0.25 |  | 129 | 128 | 257 | 257 | 257  | 32   | 32   | 257  | 16   | 32  | 8    | 64 | 0.5 | Adult | United Kingdom  |
| 16-543350 | 569 | 11  | 5   | 11 | 11 | 3  | 6  | 27 | 0.25 |  | 4   | 0.5 | 0.5 | 0.5 | 2    | 0.25 | 0.5  | 1    | 16   | 4   | 0.5  | 8  | 0.5 | Adult | United Kingdom  |
| 16-547165 | 569 | 11  | 5   | 11 | 11 | 3  | 6  | 27 | 17   |  | 4   | 1   | 0.5 | 0.5 | 0.5  | 0.06 | 0.5  | 1    | 4    | 8   | 2    | 16 | 1   | Adult | the Netherlands |
| 16-547166 | 569 | 11  | 5   | 11 | 11 | 3  | 6  | 27 | 1    |  | 4   | 2   | 0.5 | 2   | 2    | 0.06 | 0.12 | 2    | 0.25 | 1   | 0.5  | 2  | 0.5 | Adult | the Netherlands |
| 16-555932 | 569 | 11  | 5   | 11 | 11 | 3  | 6  | 27 | 0.06 |  | 1   | 2   | 2   | 0.5 | 4    | 0.06 | 2    | 16   | 0.25 | 1   | 0.5  | 2  | 1   | Ped   | the Netherlands |
| 16-537372 | 575 | 11  | 5   | 83 | 2  | 4  | 13 | 7  | 0.06 |  | 32  | 256 | 4   | 16  | 257  | 16   | 128  | 257  | 2    | 8   | 2    | 16 | 2   | Adult | Spain           |
| 16-537480 | 575 | 11  | 5   | 83 | 2  | 4  | 13 | 7  | 0.06 |  | 64  | 128 | 257 | 32  | 256  | 32   | 64   | 64   | 2    | 4   | 2    | 16 | 0.5 | Adult | Spain           |
| 16-537482 | 575 | 11  | 5   | 83 | 2  | 4  | 13 | 7  | 0.25 |  | 4   | 0.5 | 1   | 1   | 0.25 | 0.5  | 8    | 0.25 | 0.25 | 4   | 0.12 | 16 | 0.5 | Adult | Spain           |
| 16-538243 | 609 | 16  | 22  | 5  | 11 | 4  | 6  | 10 | 0.25 |  | 32  | 64  | 16  | 4   | 257  | 16   | 32   | 128  | 4    | 32  | 2    | 64 | 1   | Ped   | the Netherlands |
| 16-537377 | 617 | 16  | 101 | 11 | 97 | 4  | 69 | 88 | 0.12 |  | 4   | 4   | 2   | 0.5 | 8    | 16   | 32   | 32   | 0.5  | 0.5 | 0.25 | 2  | 1   | Ped   | Spain           |
| 16-538304 | 620 | 9   | 7   | 63 | 13 | 8  | 7  | 8  | 0.06 |  | 128 | 64  | 2   | 2   | 0.5  | 2    | 0.5  | 32   | 32   | 4   | 2    | 16 | 1   | Adult | the Netherlands |
| 16-540822 | 620 | 9   | 7   | 63 | 13 | 8  | 7  | 8  | 0.06 |  | 129 | 64  | 2   | 4   | 2    | 2    | 2    | 4    | 16   | 4   | 2    | 16 | 1   | Adult | the Netherlands |



|           |      |     |     |    |    |   |    |    |      |     |      |      |       |      |      |      |      |      |     |      |     |      |       |                 |
|-----------|------|-----|-----|----|----|---|----|----|------|-----|------|------|-------|------|------|------|------|------|-----|------|-----|------|-------|-----------------|
| 16-548982 | 633  | 125 | 5   | 6  | 3  | 4 | 13 | 23 | 0.12 | 1   | 1    | 2    | 0.5   | 8    | 0.12 | 0.25 | 8    | 0.12 | 1   | 0.12 | 2   | 1    | Adult | the Netherlands |
| 16-537433 | 640  | 11  | 5   | 98 | 5  | 3 | 10 | 85 | 0.12 | 4   | 2    | 4    | 1     | 16   | 0.25 | 1    | 16   | 0.25 | 2   | 1    | 2   | 1    | Ped   | Spain           |
| 16-538209 | 645  | 6   | 5   | 5  | 3  | 3 | 13 | 1  | 0.06 | 4   | 2    | 2    | 0.5   | 4    | 0.5  | 2    | 16   | 0.25 | 2   | 0.5  | 4   | 4    | Ped   | the Netherlands |
| 16-538295 | 645  | 6   | 5   | 5  | 3  | 3 | 13 | 1  | 0.03 | 2   | 1    | 2    | 0.5   | 0.5  | 0.06 | 1    | 8    | 0.25 | 2   | 1    | 8   | 1    | Adult | the Netherlands |
| 16-537392 | 664  | 28  | 3   | 94 | 13 | 1 | 4  | 10 | 0.12 | 2   | 1    | 1    | 0.016 | 0.5  | 2    | 4    | 1    | 0.03 | 4   | 1    | 8   | 0.5  | Adult | Spain           |
| 16-538234 | 667  | 5   | 67  | 76 | 3  | 1 | 7  | 62 | 0.06 | 2   | 2    | 2    | 0.5   | 8    | 0.06 | 2    | 8    | 0.25 | 1   | 0.5  | 2   | 1    | Ped   | the Netherlands |
| 16-547181 | 667  | 5   | 67  | 76 | 3  | 1 | 7  | 62 | 0.25 | 32  | 64   | 2    | 2     | 257  | 0.25 | 2    | 64   | 4    | 16  | 8    | 32  | 0.25 | Adult | the Netherlands |
| 16-537448 | 676  | 28  | 5   | 11 | 77 | 3 | 4  | 92 | 0.12 | 4   | 1    | 1    | 1     | 1    | 0.06 | 0.5  | 1    | 0.5  | 4   | 1    | 16  | 0.5  | Adult | Spain           |
| 16-537466 | 676  | 28  | 5   | 11 | 77 | 3 | 4  | 92 | 0.12 | 4   | 0.5  | 1    | 0.06  | 0.25 | 0.25 | 1    | 0.25 | 0.25 | 2   | 0.12 | 8   | 0.25 | Adult | Spain           |
| 16-540802 | 701  | 29  | 1   | 9  | 13 | 1 | 6  | 23 | 0.12 | 4   | 4    | 8    | 0.5   | 16   | 0.12 | 1    | 64   | 0.5  | 2   | 0.5  | 2   | 1    | Ped   | the Netherlands |
| 16-537528 | 702  | 6   | 5   | 4  | 3  | 3 | 4  | 7  | 0.06 | 8   | 2    | 32   | 1     | 256  | 0.06 | 1    | 16   | 0.5  | 8   | 0.5  | 8   | 2    |       | Spain           |
| 16-537426 | 708  | 11  | 3   | 11 | 3  | 1 | 4  | 60 | 17   | 129 | 257  | 32   | 257   | 256  | 32   | 32   | 257  | 0.5  | 129 | 128  | 129 | 1    | Adult | Spain           |
| 16-537334 | 760  | 15  | 121 | 36 | 5  | 4 | 15 | 8  | 0.12 | 8   | 1    | 0.5  | 2     | 1    | 0.12 | 1    | 1    | 2    | 4   | 1    | 4   | 0.5  | Adult | Spain           |
| 16-538338 | 775  | 28  | 5   | 11 | 5  | 4 | 4  | 7  | 0.12 | 2   | 1    | 2    | 0.5   | 8    | 2    | 2    | 8    | 8    | 1   | 0.25 | 2   | 1    | Adult | the Netherlands |
| 16-543362 | 859  | 11  | 133 | 11 | 5  | 3 | 15 | 19 | 1    | 4   | 0.25 | 0.25 | 2     | 0.25 | 0.06 | 1    | 0.25 | 16   | 32  | 32   | 32  | 2    | Adult | United Kingdom  |
| 16-537373 | 865  | 15  | 5   | 83 | 11 | 4 | 4  | 7  | 0.5  | 0.5 | 0.5  | 1    | 0.5   | 1    | 0.5  | 2    | 1    | 0.25 | 0.5 | 0.12 | 2   | 0.5  | Adult | Spain           |
| 16-537391 | 871  | 16  | 3   | 1  | 5  | 1 | 55 | 61 | 0.12 | 16  | 2    | 2    | 1     | 4    | 8    | 16   | 1    | 1    | 4   | 0.5  | 16  | 0.5  | Adult | Spain           |
| 16-538246 | 871  | 16  | 3   | 1  | 5  | 1 | 55 | 61 | 0.06 | 4   | 2    | 1    | 1     | 8    | 0.25 | 1    | 8    | 0.12 | 4   | 0.5  | 8   | 1    | Ped   | the Netherlands |
| 16-537344 | 885  | 17  | 5   | 4  | 5  | 4 | 15 | 19 | 0.06 | 16  | 2    | 2    | 1     | 4    | 0.25 | 1    | 8    | 0.5  | 129 | 129  | 8   | 1    | Ped   | Spain           |
| 16-537361 | 908  | 39  | 6   | 4  | 14 | 4 | 6  | 2  | 16   | 4   | 1    | 1    | 1     | 4    | 0.5  | 0.25 | 8    | 0.12 | 2   | 0.5  | 4   | 1    | Adult | Spain           |
| 16-538230 | 1000 | 62  | 8   | 3  | 11 | 1 | 15 | 1  | 0.12 | 4   | 4    | 4    | 0.5   | 16   | 0.25 | 4    | 32   | 0.5  | 2   | 0.5  | 4   | 1    | Ped   | the Netherlands |
| 16-537475 | 1046 | 17  | 45  | 20 | 5  | 4 | 4  | 2  | 0.12 | 16  | 8    | 1    | 2     | 32   | 0.25 | 1    | 8    | 0.5  | 64  | 16   | 129 | 1    | Adult | Spain           |

|           |      |     |     |    |    |    |    |     |      |    |      |      |      |      |      |      |      |      |     |     |     |     |       |                 |
|-----------|------|-----|-----|----|----|----|----|-----|------|----|------|------|------|------|------|------|------|------|-----|-----|-----|-----|-------|-----------------|
| 16-538297 | 1050 | 1   | 47  | 11 | 5  | 4  | 15 | 10  | 0.06 | 1  | 1    | 1    | 0.5  | 0.25 | 0.12 | 2    | 8    | 0.25 | 2   | 0.5 | 4   | 1   | Adult | the Netherlands |
| 16-547150 | 1062 | 22  | 5   | 91 | 33 | 4  | 4  | 1   | 2    | 8  | 2    | 2    | 0.5  | 2    | 0.5  | 1    | 1    | 1    | 16  | 2   | 64  | 0.5 | Adult | the Netherlands |
| 16-537381 | 1068 | 23  | 5   | 11 | 7  | 1  | 12 | 137 | 0.12 | 4  | 2    | 2    | 1    | 8    | 0.12 | 0.5  | 16   | 8    | 8   | 2   | 16  | 1   | Adult | Spain           |
| 16-543364 | 1091 | 6   | 5   | 11 | 5  | 3  | 6  | 1   | 0.12 | 32 | 8    | 8    | 2    | 16   | 8    | 16   | 32   | 4    | 32  | 4   | 64  | 0.5 | Adult | United Kingdom  |
| 16-537338 | 1109 | 16  | 14  | 3  | 11 | 1  | 15 | 1   | 0.5  | 8  | 1    | 4    | 1    | 4    | 0.12 | 1    | 2    | 0.5  | 129 | 32  | 129 | 0.5 | Adult | Spain           |
| 16-538223 | 1135 | 6   | 8   | 11 | 63 | 4  | 15 | 2   | 2    | 2  | 1    | 0.25 | 1    | 2    | 0.12 | 1    | 2    | 8    | 8   | 4   | 64  | 0.5 | Ped   | the Netherlands |
| 16-555933 | 1158 | 5   | 4   | 3  | 6  | 1  | 33 | 42  | 0.12 | 8  | 4    | 4    | 1    | 8    | 0.25 | 2    | 32   | 0.25 | 2   | 1   | 4   | 4   | Ped   | the Netherlands |
| 16-537378 | 1180 | 65  | 112 | 11 | 3  | 1  | 12 | 138 | 0.5  | 64 | 64   | 8    | 1    | 257  | 8    | 32   | 64   | 8    | 64  | 16  | 128 | 1   | Adult | Spain           |
| 16-543345 | 1203 | 33  | 1   | 25 | 6  | 6  | 7  | 5   | 0.12 | 2  | 1    | 1    | 0.25 | 0.5  | 0.06 | 1    | 0.5  | 2    | 4   | 1   | 16  | 1   | Adult | United Kingdom  |
| 16-543346 | 1203 | 33  | 1   | 25 | 6  | 6  | 7  | 5   | 0.5  | 4  | 2    | 0.5  | 0.25 | 4    | 0.25 | 2    | 0.5  | 2    | 8   | 2   | 8   | 1   | Adult | United Kingdom  |
| 16-543347 | 1203 | 33  | 1   | 25 | 6  | 6  | 7  | 5   | 1    | 4  | 1    | 1    | 0.5  | 1    | 0.25 | 2    | 0.5  | 2    | 4   | 1   | 8   | 0.5 | Adult | United Kingdom  |
| 16-543348 | 1203 | 33  | 1   | 25 | 6  | 6  | 7  | 5   | 1    | 4  | 0.5  | 0.5  | 0.25 | 0.5  | 0.12 | 2    | 0.5  | 2    | 2   | 0.5 | 4   | 0.5 | Adult | United Kingdom  |
| 16-543382 | 1203 | 33  | 1   | 25 | 6  | 6  | 7  | 5   | 17   | 2  | 0.25 | 0.5  | 0.12 | 0.25 | 0.06 | 0.5  | 0.25 | 2    | 16  | 2   | 16  | 0.5 | Adult | United Kingdom  |
| 16-538277 | 1225 | 118 | 106 | 85 | 92 | 60 | 54 | 72  | 1    | 16 | 1    | 2    | 2    | 32   | 16   | 32   | 32   | 16   | 8   | 2   | 16  | 1   | Adult | the Netherlands |
| 16-540816 | 1225 | 118 | 106 | 85 | 92 | 60 | 54 | 72  | 0.5  | 8  | 4    | 4    | 1    | 16   | 0.12 | 0.25 | 32   | 16   | 8   | 2   | 16  | 1   | Adult | the Netherlands |
| 16-540818 | 1225 | 118 | 106 | 85 | 92 | 60 | 54 | 72  | 0.5  | 4  | 1    | 2    | 1    | 8    | 0.12 | 0.5  | 16   | 16   | 8   | 2   | 16  | 0.5 | Adult | the Netherlands |
| 16-540899 | 1225 | 118 | 106 | 85 | 92 | 60 | 54 | 72  | 1    | 2  | 1    | 1    | 0.25 | 2    | 0.06 | 2    | 1    | 2    | 8   | 2   | 32  | 0.5 | Adult | the Netherlands |
| 16-540900 | 1225 | 118 | 106 | 85 | 92 | 60 | 54 | 72  | 0.5  | 4  | 1    | 0.5  | 0.5  | 0.5  | 0.06 | 2    | 0.5  | 8    | 8   | 2   | 16  | 0.5 | Adult | the Netherlands |
| 16-540901 | 1225 | 118 | 106 | 85 | 92 | 60 | 54 | 72  | 8    | 16 | 128  | 1    | 2    | 257  | 0.25 | 2    | 128  | 8    | 129 | 32  | 129 | 0.5 | Adult | the Netherlands |
| 16-546331 | 1225 | 118 | 106 | 85 | 92 | 60 | 54 | 72  | 1    | 8  | 4    | 1    | 2    | 1    | 0.06 | 1    | 1    | 8    | 8   | 2   | 8   | 1   | Adult | the Netherlands |
| 16-546332 | 1225 | 118 | 106 | 85 | 92 | 60 | 54 | 72  | 0.5  | 8  | 1    | 1    | 0.5  | 1    | 0.12 | 4    | 1    | 8    | 4   | 4   | 4   | 0.5 | Adult | the Netherlands |
| 16-538229 | 1226 | 11  | 66  | 11 | 3  | 29 | 4  | 9   | 0.06 | 2  | 4    | 4    | 0.5  | 8    | 0.12 | 2    | 16   | 0.12 | 2   | 1   | 4   | 1   | Ped   | the Netherlands |

|           |      |     |     |    |     |    |    |     |       |  |     |     |      |      |      |      |      |     |      |     |      |     |      |       |                  |
|-----------|------|-----|-----|----|-----|----|----|-----|-------|--|-----|-----|------|------|------|------|------|-----|------|-----|------|-----|------|-------|------------------|
| 16-547175 | 1226 | 11  | 66  | 11 | 3   | 29 | 4  | 9   | 8     |  | 2   | 0.5 | 0.5  | 1    | 1    | 0.06 | 0.12 | 0.5 | 4    | 64  | 16   | 128 | 0.5  | Adult | the Netherlands  |
| 16-547176 | 1226 | 11  | 66  | 11 | 3   | 29 | 4  | 9   | 8     |  | 4   | 0.5 | 2    | 1    | 2    | 0.06 | 0.5  | 0.5 | 2    | 8   | 0.5  | 16  | 0.25 | Adult | the Netherlands  |
| 16-547177 | 1226 | 11  | 66  | 11 | 3   | 29 | 4  | 9   | 4     |  | 2   | 0.5 | 0.5  | 0.5  | 1    | 0.06 | 0.12 | 0.5 | 2    | 64  | 16   | 64  | 0.5  | Adult | the Netherlands  |
| 16-555918 | 1227 | 17  | 5   | 12 | 3   | 11 | 4  | 7   | 4     |  | 16  | 32  | 0.25 | 1    | 0.25 | 4    | 16   | 257 | 1    | 16  | 4    | 64  | 0.5  | Adult | the Netherlands  |
| 16-537362 | 1228 | 11  | 5   | 5  | 29  | 4  | 4  | 26  | 0.12  |  | 8   | 2   | 2    | 1    | 1    | 0.12 | 8    | 1   | 8    | 2   | 1    | 8   | 1    | Adult | Spain            |
| 16-538330 | 1228 | 11  | 5   | 5  | 29  | 4  | 4  | 26  | 0.06  |  | 1   | 1   | 2    | 0.25 | 2    | 0.12 | 0.25 | 8   | 0.03 | 1   | 0.5  | 2   | 1    | Adult | the Netherlands  |
| 16-538278 | 1230 | 15  | 5   | 36 | 72  | 4  | 42 | 19  | 2     |  | 8   | 4   | 2    | 1    | 1    | 0.12 | 0.25 | 2   | 0.12 | 16  | 1    | 32  | 0.5  | Adult | the Netherlands  |
| 16-538323 | 1231 | 15  | 3   | 11 | 11  | 1  | 18 | 1   | 0.25  |  | 8   | 32  | 2    | 0.5  | 16   | 0.25 | 0.5  | 32  | 8    | 2   | 1    | 8   | 1    | Adult | the Netherlands  |
| 16-538325 | 1231 | 15  | 3   | 11 | 11  | 1  | 18 | 1   | 16    |  | 8   | 2   | 4    | 1    | 16   | 8    | 32   | 8   | 4    | 16  | 4    | 32  | 1    | Adult | the Netherlands  |
| 16-555904 | 1233 | 17  | 5   | 11 | 3   | 4  | 6  | 7   | 0.5   |  | 128 | 257 | 32   | 4    | 257  | 2    | 4    | 256 | 1    | 64  | 16   | 128 | 0.5  | Adult | the Netherlands  |
| 16-538342 | 1238 | 11  | 5   | 11 | 2   | 4  | 38 | 10  | 0.06  |  | 8   | 1   | 2    | 0.5  | 4    | 0.06 | 0.25 | 4   | 2    | 1   | 0.25 | 2   | 1    | Adult | the Netherlands  |
| 16-538343 | 1238 | 11  | 5   | 11 | 2   | 4  | 38 | 10  | 0.06  |  | 16  | 1   | 2    | 0.5  | 8    | 0.06 | 0.25 | 2   | 2    | 1   | 0.25 | 2   | 0.5  | Adult | the Netherlands  |
| 16-538205 | 1240 | 28  | 5   | 11 | 7   | 1  | 6  | 61  | 0.06  |  | 4   | 1   | 1    | 0.25 | 0.5  | 0.12 | 1    | 0.5 | 0.12 | 4   | 1    | 16  | 0.5  | Ped   | the Netherlands  |
| 16-537427 | 1251 | 35  | 11  | 25 | 6   | 13 | 6  | 84  | 0.016 |  | 4   | 2   | 4    | 0.5  | 8    | 1    | 4    | 8   | 16   | 0.5 | 0.5  | 4   | 0.5  | Adult | Spain            |
| 16-538196 | 1312 | 40  | 5   | 11 | 82  | 4  | 13 | 152 | 0.03  |  | 16  | 2   | 8    | 0.5  | 64   | 16   | 32   | 16  | 0.5  | 64  | 8    | 64  | 0.5  | Ped   | the Netherlands  |
| 16-538286 | 1315 | 36  | 5   | 29 | 132 | 4  | 10 | 7   | 0.12  |  | 128 | 8   | 2    | 2    | 2    | 32   | 128  | 64  | 16   | 8   | 1    | 16  | 0.5  | Adult | the Netherlands  |
| 16-540905 | 1342 | 1   | 5   | 26 | 3   | 1  | 10 | 3   | 0.06  |  | 4   | 8   | 4    | 1    | 16   | 2    | 32   | 64  | 0.5  | 8   | 1    | 8   | 1    | Adult | the Netherlands  |
| 16-537331 | 1641 | 11  | 10  | 1  | 3   | 27 | 4  | 7   | 0.06  |  | 16  | 4   | 4    | 0.5  | 128  | 0.5  | 1    | 4   | 0.5  | 4   | 4    | 64  | 0.5  | Adult | Spain            |
| 16-543361 | 1712 | 16  | 5   | 30 | 11  | 4  | 31 | 7   | 8     |  | 2   | 2   | 0.5  | 1    | 0.25 | 0.5  | 16   | 2   | 8    | 32  | 4    | 16  | 2    | Ped   | Northern Ireland |
| 16-543387 | 1712 | 16  | 5   | 30 | 11  | 4  | 31 | 7   | 0.5   |  | 128 | 257 | 257  | 32   | 257  | 32   | 32   | 257 | 4    | 129 | 32   | 129 | 0.5  | Adult | Northern Ireland |
| 16-538236 | 1744 | 118 | 106 | 85 | 86  | 72 | 73 | 208 | 0.06  |  | 4   | 8   | 8    | 1    | 32   | 1    | 2    | 64  | 1    | 2   | 0.25 | 2   | 0.5  | Ped   | the Netherlands  |
| 16-537329 | 1748 | 16  | 5   | 30 | 11  | 4  | 13 | 7   | 4     |  | 129 | 64  | 4    | 4    | 257  | 16   | 16   | 257 | 2    | 32  | 4    | 128 | 0.5  | Adult | Spain            |

|           |      |     |     |    |     |    |    |     |       |     |      |      |      |      |      |      |     |      |      |      |      |     |       |                 |
|-----------|------|-----|-----|----|-----|----|----|-----|-------|-----|------|------|------|------|------|------|-----|------|------|------|------|-----|-------|-----------------|
| 16-555934 | 1754 | 11  | 182 | 5  | 5   | 3  | 10 | 25  | 0.25  | 8   | 4    | 2    | 1    | 8    | 0.06 | 0.25 | 1   | 1    | 2    | 0.5  | 2    | 1   | Ped   | the Netherlands |
| 16-555935 | 1754 | 11  | 182 | 5  | 5   | 3  | 10 | 25  | 0.12  | 2   | 2    | 2    | 0.5  | 4    | 0.06 | 1    | 16  | 0.25 | 2    | 1    | 4    | 0.5 | Ped   | the Netherlands |
| 16-555936 | 1754 | 11  | 182 | 5  | 5   | 3  | 10 | 25  | 0.25  | 1   | 1    | 1    | 1    | 1    | 0.12 | 128  | 256 | 1    | 2    | 2    | 4    | 16  | Ped   | the Netherlands |
| 16-537394 | 1811 | 119 | 10  | 11 | 3   | 3  | 6  | 77  | 0.12  | 2   | 0.25 | 2    | 1    | 2    | 0.06 | 0.12 | 1   | 0.5  | 4    | 0.25 | 8    | 0.5 | Adult | Spain           |
| 16-537370 | 1872 | 11  | 5   | 1  | 117 | 9  | 4  | 190 | 0.016 | 8   | 8    | 8    | 1    | 32   | 32   | 16   | 128 | 32   | 4    | 2    | 8    | 0.5 | Adult | Spain           |
| 16-537371 | 1872 | 11  | 5   | 1  | 117 | 9  | 4  | 190 | 0.016 | 8   | 4    | 8    | 1    | 32   | 32   | 32   | 64  | 33   | 4    | 2    | 8    | 0.5 | Adult | Spain           |
| 16-537382 | 1874 | 29  | 188 | 95 | 13  | 8  | 6  | 11  | 0.12  | 2   | 0.5  | 0.5  | 0.25 | 0.5  | 0.06 | 0.5  | 0.5 | 2    | 0.25 | 0.12 | 0.5  | 1   | Adult | Spain           |
| 16-537384 | 1874 | 29  | 188 | 95 | 13  | 8  | 6  | 11  | 0.06  | 2   | 0.5  | 0.25 | 0.25 | 0.25 | 0.06 | 0.5  | 0.5 | 4    | 0.25 | 0.12 | 0.5  | 1   | Adult | Spain           |
| 16-537385 | 1874 | 29  | 188 | 95 | 13  | 8  | 6  | 11  | 0.06  | 2   | 0.5  | 1    | 0.25 | 1    | 0.06 | 0.5  | 0.5 | 4    | 0.5  | 0.12 | 0.5  | 1   | Adult | Spain           |
| 16-537387 | 1876 | 40  | 181 | 11 | 11  | 3  | 4  | 9   | 0.12  | 2   | 2    | 4    | 0.5  | 4    | 0.12 | 4    | 16  | 0.12 | 2    | 0.5  | 4    | 1   | Ped   | Spain           |
| 16-537446 | 1883 | 17  | 5   | 11 | 3   | 4  | 12 | 56  | 1     | 129 | 257  | 128  | 257  | 257  | 32   | 16   | 257 | 0.5  | 32   | 4    | 64   | 1   | Adult | Spain           |
| 16-537470 | 1883 | 17  | 5   | 11 | 3   | 4  | 12 | 56  | 0.12  | 8   | 0.5  | 2    | 2    | 4    | 0.06 | 1    | 16  | 0.25 | 8    | 2    | 8    | 1   | Adult | Spain           |
| 16-537383 | 1884 | 17  | 5   | 12 | 3   | 99 | 4  | 7   | 1     | 64  | 257  | 32   | 32   | 257  | 64   | 16   | 257 | 0.03 | 2    | 4    | 16   | 1   | Adult | Spain           |
| 16-537456 | 1884 | 17  | 5   | 12 | 3   | 99 | 4  | 7   | 1     | 64  | 257  | 256  | 64   | 257  | 32   | 32   | 257 | 8    | 8    | 2    | 32   | 1   | Adult | Spain           |
| 16-537330 | 1886 | 7   | 133 | 36 | 63  | 2  | 15 | 2   | 0.03  | 0.5 | 0.25 | 0.25 | 0.12 | 0.5  | 0.06 | 0.12 | 0.5 | 0.25 | 0.12 | 4    | 0.25 | 0.5 | Ped   | Spain           |
| 16-537359 | 1894 | 17  | 187 | 1  | 3   | 4  | 15 | 3   | 0.06  | 4   | 2    | 1    | 1    | 0.25 | 0.06 | 1    | 1   | 1    | 8    | 4    | 32   | 0.5 | Adult | Spain           |
| 16-537418 | 1907 | 11  | 5   | 11 | 131 | 3  | 53 | 1   | 4     | 2   | 2    | 1    | 0.12 | 4    | 0.25 | 0.5  | 16  | 1    | 8    | 2    | 16   | 4   | Adult | Spain           |
| 16-537420 | 1908 | 11  | 6   | 19 | 5   | 4  | 15 | 9   | 0.5   | 4   | 4    | 1    | 0.25 | 0.5  | 2    | 8    | 0.5 | 4    | 16   | 2    | 64   | 0.5 | Adult | Spain           |
| 16-537421 | 1909 | 17  | 5   | 5  | 4   | 4  | 4  | 191 | 0.5   | 4   | 2    | 0.25 | 1    | 0.25 | 0.25 | 0.5  | 16  | 0.06 | 16   | 0.5  | 32   | 1   | Adult | Spain           |
| 16-537431 | 1912 | 11  | 5   | 11 | 3   | 1  | 15 | 14  | 0.25  | 2   | 1    | 1    | 0.5  | 0.5  | 0.25 | 2    | 1   | 0.5  | 4    | 1    | 8    | 1   | Adult | Spain           |
| 16-538204 | 2048 | 40  | 5   | 11 | 5   | 2  | 4  | 37  | 0.12  | 2   | 1    | 2    | 0.5  | 4    | 0.06 | 0.12 | 4   | 0.5  | 2    | 0.5  | 4    | 0.5 | Ped   | the Netherlands |
| 16-547186 | 2098 | 51  | 4   | 65 | 167 | 15 | 6  | 7   | 0.06  | 4   | 2    | 8    | 0.25 | 8    | 0.25 | 8    | 32  | 0.25 | 2    | 0.5  | 4    | 1   | Adult | the Netherlands |

|           |      |     |    |     |     |    |     |     |      |      |      |      |      |      |      |      |      |      |     |      |     |     |       |                  |                 |
|-----------|------|-----|----|-----|-----|----|-----|-----|------|------|------|------|------|------|------|------|------|------|-----|------|-----|-----|-------|------------------|-----------------|
| 16-538193 | 2211 | 87  | 34 | 114 | 37  | 86 | 100 | 170 | 4    |      | 16   | 2    | 4    | 0.5  | 8    | 0.25 | 0.5  | 4    | 1   | 8    | 2   | 16  | 1     | Ped              | the Netherlands |
| 16-538194 | 2211 | 87  | 34 | 114 | 37  | 86 | 100 | 170 | 16   | 8    | 2    | 2    | 2    | 4    | 2    | 16   | 8    | 0.5  | 8   | 2    | 16  | 1   | Ped   | the Netherlands  |                 |
| 16-538220 | 2211 | 87  | 34 | 114 | 37  | 86 | 100 | 170 | 1    | 1    | 1    | 2    | 1    | 8    | 2    | 16   | 8    | 0.12 | 1   | 0.25 | 2   | 1   | Ped   | the Netherlands  |                 |
| 16-537346 | 2363 | 6   | 5  | 11  | 11  | 4  | 4   | 1   | 0.12 | 4    | 2    | 2    | 2    | 4    | 0.06 | 0.25 | 4    | 4    | 4   | 4    | 32  | 8   | 1     | Adult            | Spain           |
| 16-537336 | 2409 | 17  | 5  | 11  | 61  | 3  | 4   | 2   | 0.12 | 4    | 1    | 1    | 0.5  | 2    | 0.06 | 0.5  | 1    | 1    | 4   | 1    | 8   | 0.5 | Ped   | Spain            |                 |
| 16-547172 | 2455 | 175 | 5  | 1   | 11  | 3  | 15  | 7   | 0.12 | 8    | 8    | 4    | 1    | 8    | 0.25 | 2    | 16   | 2    | 4   | 1    | 8   | 1   | Adult | the Netherlands  |                 |
| 16-547187 | 2455 | 175 | 5  | 1   | 11  | 3  | 15  | 7   | 0.06 | 8    | 4    | 4    | 1    | 16   | 0.25 | 2    | 16   | 0.5  | 4   | 1    | 8   | 0.5 | Adult | the Netherlands  |                 |
| 16-555914 | 2455 | 175 | 5  | 1   | 11  | 3  | 15  | 7   | 0.12 | 4    | 1    | 1    | 1    | 2    | 0.12 | 1    | 4    | 0.25 | 2   | 0.25 | 8   | 1   | Adult | the Netherlands  |                 |
| 16-555872 | 2465 | 1   | 3  | 11  | 5   | 4  | 29  | 2   | 17   | 1    | 2    | 2    | 0.5  | 4    | 0.06 | 2    | 32   | 0.5  | 1   | 4    | 2   | 17  | Adult | the Netherlands  |                 |
| 16-555873 | 2465 | 1   | 3  | 11  | 5   | 4  | 29  | 2   | 17   | 2    | 1    | 4    | 0.5  | 8    | 0.06 | 1    | 4    | 0.5  | 2   | 0.5  | 16  | 1   | Adult | the Netherlands  |                 |
| 16-538237 | 2495 | 11  | 8  | 36  | 72  | 2  | 4   | 171 | 0.03 | 4    | 2    | 2    | 1    | 8    | 0.12 | 2    | 16   | 0.5  | 4   | 1    | 32  | 1   | Ped   | the Netherlands  |                 |
| 16-538217 | 2629 | 28  | 20 | 94  | 3   | 1  | 4   | 10  | 0.06 | 0.25 | 0.25 | 0.25 | 0.5  | 0.25 | 0.06 | 1    | 1    | 0.06 | 0.5 | 0.25 | 1   | 1   | Ped   | the Netherlands  |                 |
| 16-548984 | 2685 | 23  | 5  | 7   | 30  | 1  | 4   | 10  | 0.06 | 2    | 0.5  | 2    | 0.5  | 4    | 0.06 | 1    | 0.5  | 4    | 1   | 4    | 2   | 0.5 | Ped   | Spain            |                 |
| 16-538313 | 3006 | 11  | 5  | 91  | 3   | 83 | 90  | 1   | 0.12 | 2    | 0.5  | 1    | 0.5  | 2    | 0.12 | 2    | 1    | 1    | 1   | 0.25 | 2   | 1   | Adult | the Netherlands  |                 |
| 16-538315 | 3006 | 11  | 5  | 91  | 3   | 83 | 90  | 1   | 0.06 | 2    | 0.5  | 1    | 0.25 | 2    | 0.12 | 1    | 1    | 0.5  | 1   | 0.25 | 2   | 1   | Adult | the Netherlands  |                 |
| 16-537365 | 3159 | 5   | 3  | 57  | 3   | 1  | 33  | 189 | 2    | 128  | 4    | 2    | 0.5  | 4    | 2    | 16   | 257  | 1    | 64  | 1    | 129 | 1   | Adult | Spain            |                 |
| 16-537390 | 3160 | 6   | 4  | 26  | 5   | 1  | 4   | 26  | 0.12 | 16   | 2    | 8    | 0.5  | 8    | 0.25 | 1    | 2    | 0.25 | 16  | 4    | 64  | 0.5 | Adult | Spain            |                 |
| 16-543354 | 3161 | 89  | 30 | 9   | 26  | 48 | 24  | 32  | 0.5  | 0.5  | 1    | 0.25 | 1    | 0.25 | 0.12 | 0.5  | 0.5  | 0.5  | 4   | 2    | 32  | 1   | Ped   | Northern Ireland |                 |
| 16-543368 | 3161 | 89  | 30 | 9   | 26  | 48 | 24  | 32  | 0.12 | 4    | 0.5  | 1    | 0.5  | 1    | 0.25 | 4    | 0.5  | 2    | 1   | 0.25 | 2   | 0.5 | Adult | Northern Ireland |                 |
| 16-547185 | 3163 | 6   | 5  | 1   | 72  | 15 | 18  | 3   | 0.06 | 2    | 2    | 2    | 1    | 4    | 0.12 | 1    | 8    | 0.5  | 2   | 1    | 4   | 4   | Adult | the Netherlands  |                 |
| 16-540825 | 3164 | 40  | 5  | 11  | 197 | 4  | 13  | 7   | 0.25 | 128  | 257  | 8    | 32   | 257  | 32   | 64   | 257  | 32   | 32  | 64   | 32  | 4   | Adult | the Netherlands  |                 |
| 16-537444 | 3166 | 16  | 5  | 26  | 3   | 4  | 4   | 26  | 0.03 | 0.25 | 2    | 0.5  | 1    | 0.25 | 0.06 | 0.12 | 0.25 | 0.03 | 1   | 8    | 4   | 1   | Adult | Spain            |                 |

|           |      |     |     |    |     |     |    |     |      |     |     |      |      |      |      |      |      |      |      |      |     |     |       |                  |
|-----------|------|-----|-----|----|-----|-----|----|-----|------|-----|-----|------|------|------|------|------|------|------|------|------|-----|-----|-------|------------------|
| 16-543335 | 3167 | 16  | 5   | 5  | 3   | 3   | 12 | 26  | 0.06 | 2   | 2   | 0.5  | 0.25 | 2    | 1    | 16   | 0.5  | 1    | 1    | 0.25 | 4   | 16  | Adult | Northern Ireland |
| 16-547169 | 3169 | 40  | 5   | 30 | 61  | 1   | 7  | 263 | 2    | 16  | 16  | 4    | 0.5  | 128  | 8    | 16   | 8    | 2    | 2    | 0.5  | 8   | 0.5 | Adult | the Netherlands  |
| 16-547183 | 3170 | 173 | 5   | 5  | 363 | 3   | 13 | 9   | 0.12 | 8   | 8   | 16   | 1    | 64   | 2    | 1    | 128  | 0.5  | 1    | 0.5  | 4   | 2   | Adult | the Netherlands  |
| 16-548987 | 3171 | 11  | 5   | 1  | 7   | 3   | 56 | 264 | 0.25 | 4   | 1   | 1    | 0.25 | 4    | 0.06 | 1    | 0.5  | 2    | 8    | 1    | 8   | 1   | Adult | the Netherlands  |
| 16-555922 | 3172 | 11  | 5   | 1  | 7   | 9   | 4  | 262 | 0.12 | 32  | 64  | 2    | 1    | 256  | 16   | 32   | 256  | 8    | 8    | 2    | 16  | 2   | Adult | the Netherlands  |
| 16-555928 | 3173 | 6   | 5   | 36 | 222 | 4   | 30 | 2   | 0.12 | 8   | 0.5 | 0.25 | 0.25 | 1    | 0.06 | 1    | 0.5  | 8    | 128  | 64   | 129 | 17  | Adult | the Netherlands  |
| 16-543360 | 3174 | 6   | 5   | 11 | 3   | 4   | 3  | 1   | 1    | 4   | 256 | 4    | 2    | 64   | 16   | 8    | 256  | 8    | 32   | 32   | 64  | 8   | Adult | Northern Ireland |
| 16-540895 | 3175 | 5   | 291 | 25 | 88  | 1   | 1  | 42  | 0.03 | 2   | 1   | 2    | 0.5  | 4    | 0.25 | 2    | 8    | 2    | 0.5  | 0.12 | 0.5 | 0.5 | Ped   | the Netherlands  |
| 16-538337 | 3176 | 28  | 5   | 11 | 77  | 73  | 12 | 10  | 0.06 | 16  | 4   | 4    | 1    | 8    | 0.12 | 0.25 | 16   | 16   | 2    | 0.5  | 8   | 1   | Adult | the Netherlands  |
| 16-538335 | 3177 | 28  | 5   | 11 | 77  | 1   | 12 | 92  | 0.03 | 16  | 2   | 2    | 0.5  | 8    | 16   | 8    | 8    | 2    | 0.25 | 0.12 | 0.5 | 1   | Adult | the Netherlands  |
| 16-537367 | 3178 | 28  | 10  | 12 | 3   | 3   | 4  | 185 | 0.12 | 16  | 1   | 2    | 1    | 4    | 4    | 4    | 4    | 0.25 | 4    | 1    | 16  | 1   | Adult | Spain            |
| 16-538222 | 3179 | 39  | 5   | 36 | 3   | 4   | 29 | 2   | 0.12 | 2   | 4   | 1    | 1    | 1    | 0.12 | 0.25 | 1    | 1    | 32   | 2    | 64  | 0.5 | Ped   | the Netherlands  |
| 16-538215 | 3180 | 40  | 22  | 1  | 11  | 4   | 13 | 7   | 0.25 | 2   | 0.5 | 1    | 0.5  | 2    | 0.5  | 2    | 4    | 1    | 4    | 1    | 8   | 1   | Ped   | the Netherlands  |
| 16-537487 | 3181 | 41  | 5   | 1  | 7   | 11  | 4  | 112 | 0.5  | 4   | 1   | 1    | 0.5  | 0.5  | 0.5  | 4    | 0.5  | 1    | 32   | 4    | 64  | 1   | Adult | Spain            |
| 16-537511 | 3181 | 41  | 5   | 1  | 7   | 11  | 4  | 112 | 0.25 | 2   | 0.5 | 0.5  | 0.5  | 0.25 | 0.25 | 4    | 0.5  | 1    | 32   | 4    | 32  | 0.5 | Adult | Spain            |
| 16-537335 | 3183 | 5   | 1   | 65 | e   | 10  | 7  | 23  | 0.06 | 0.5 | 0.5 | 0.25 | 0.25 | 0.25 | 0.06 | 1    | 0.25 | 0.5  | 129  | 32   | 8   | 0.5 | Ped   | Spain            |
| 16-538187 | xx   | 39  | 5   | 20 | 5   | 1   | 6  | abs | 0.12 | 16  | 16  | 1    | 1    | 128  | 2    | 4    | 4    | 1    | 4    | 1    | 4   | 0.5 | Ped   | the Netherlands  |
| 16-538188 | xx   | 39  | 5   | 20 | 5   | 1   | 6  | abs | 0.12 | 32  | 32  | 4    | 1    | 256  | 2    | 8    | 16   | 2    | 8    | 1    | 16  | 0.5 | Ped   | the Netherlands  |
| 16-555916 | yy   | 39  | 5   | 9  | 11  | abs | 5  | 2   | 0.12 | 64  | 257 | 4    | 2    | 4    | 8    | 32   | 257  | 8    | 128  | 64   | 129 | 1   | Adult | the Netherlands  |
